# Supplementary material for: Heck- and Suzuki-coupling approaches to novel hydroquinone inhibitors of calcium ATPase
Source: publisher site journal article supplement (doi:10.3762/bjoc.15.94), 2019-04-24

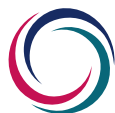

## Supporting Information

for

### Heck- and Suzuki-coupling approaches to novel hydroquinone inhibitors of calcium ATPase

Robert J. Kempton, Taylor A. Kidd-Kautz, Soizic Laurenceau and Stefan Paula

*Beilstein J. Org. Chem.* **2019**, *15*, 971–975. [doi:10.3762/bjoc.15.94](https://doi.org/10.3762/bjoc.15.94)

## NMR spectra

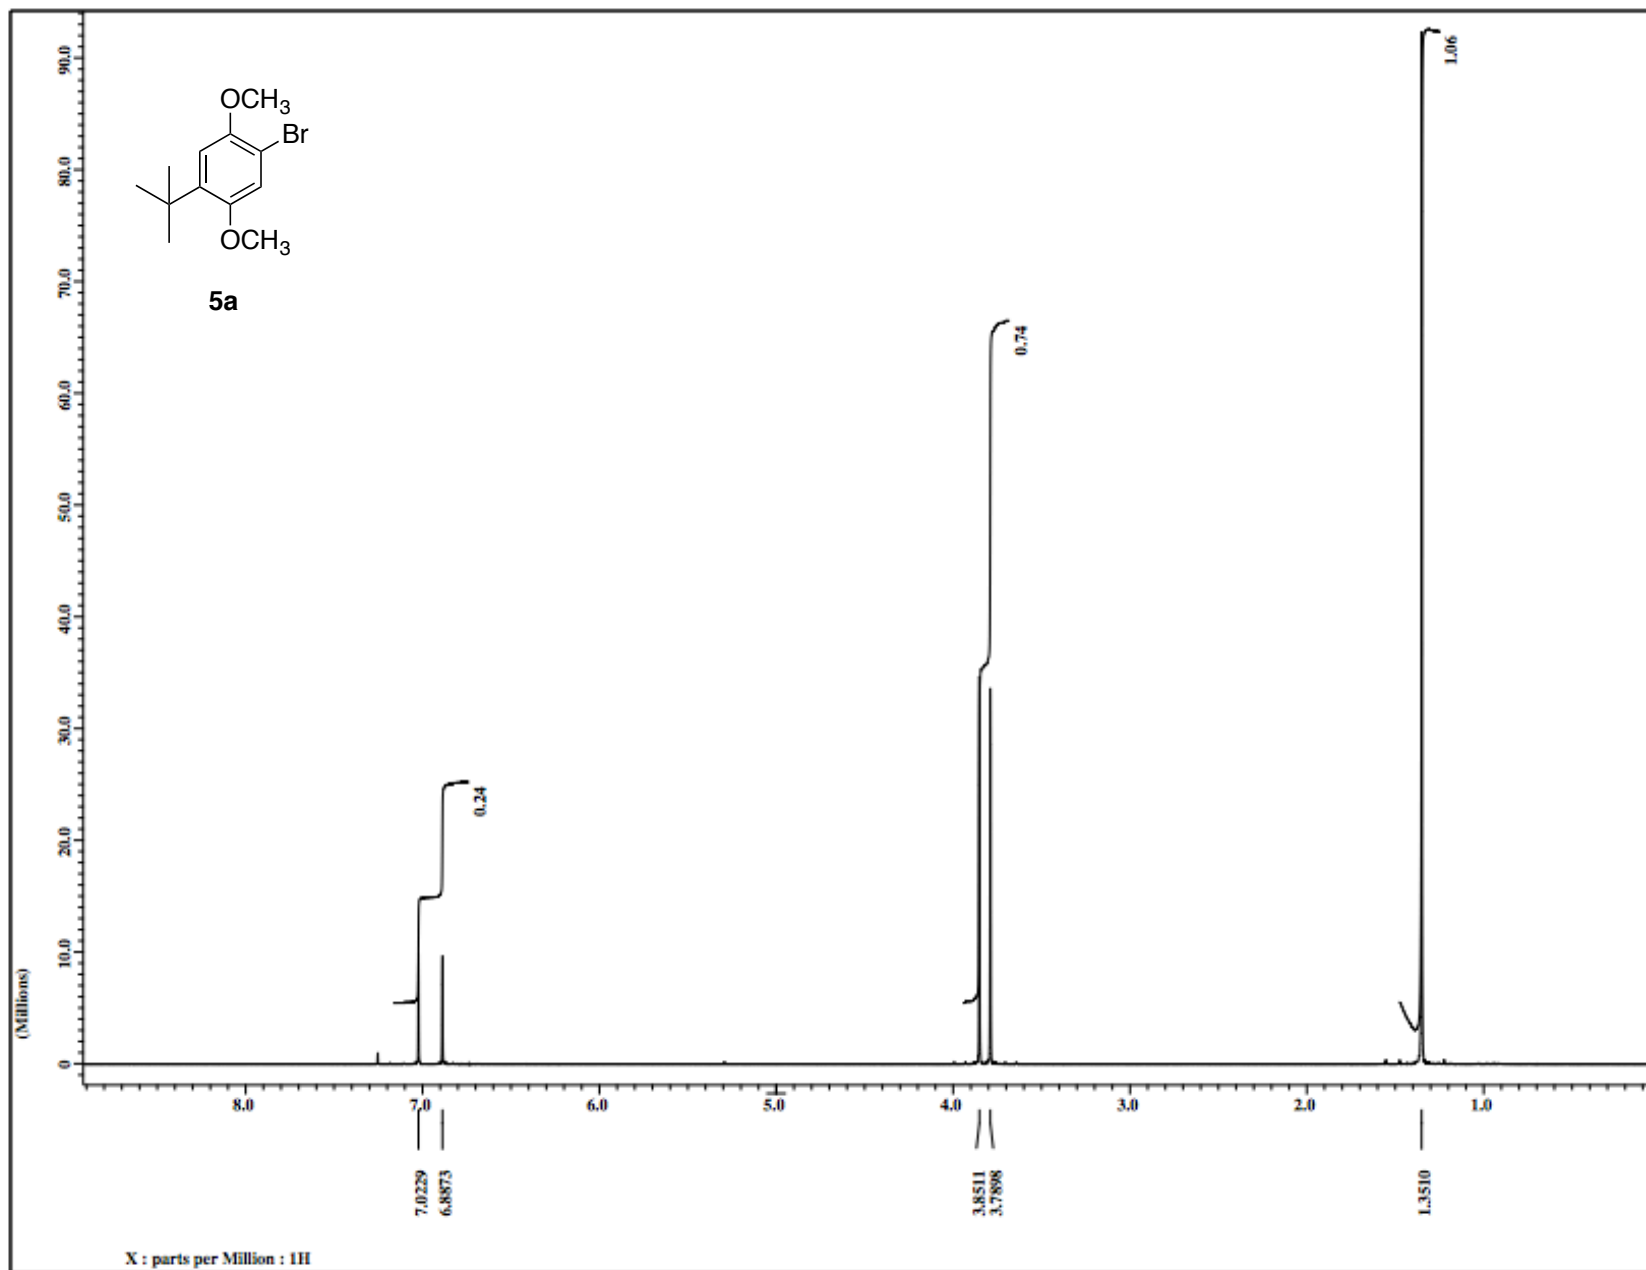

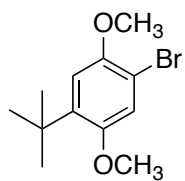

5a

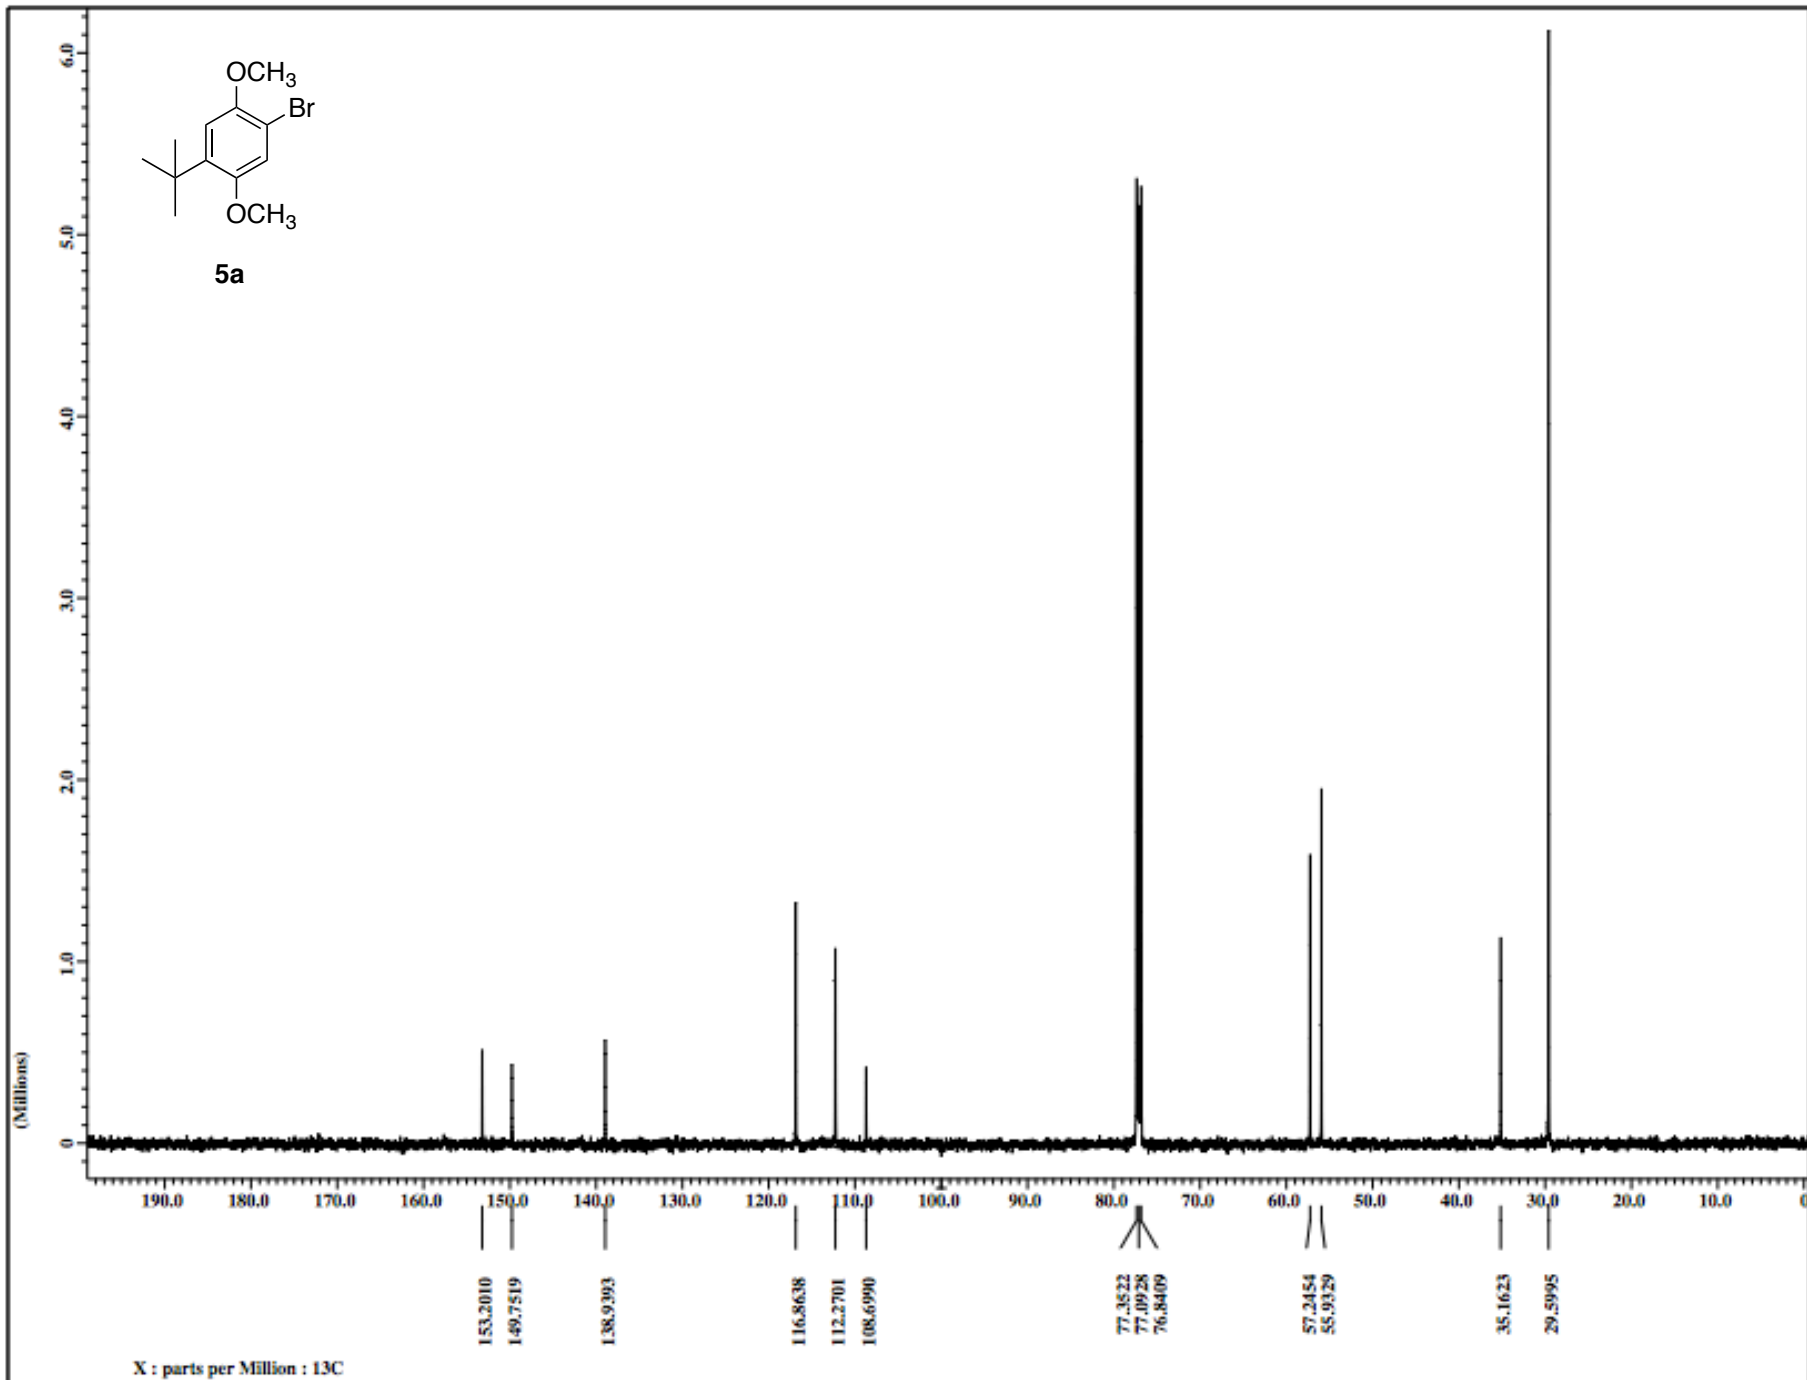

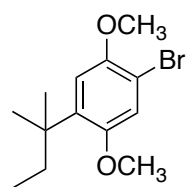

5c

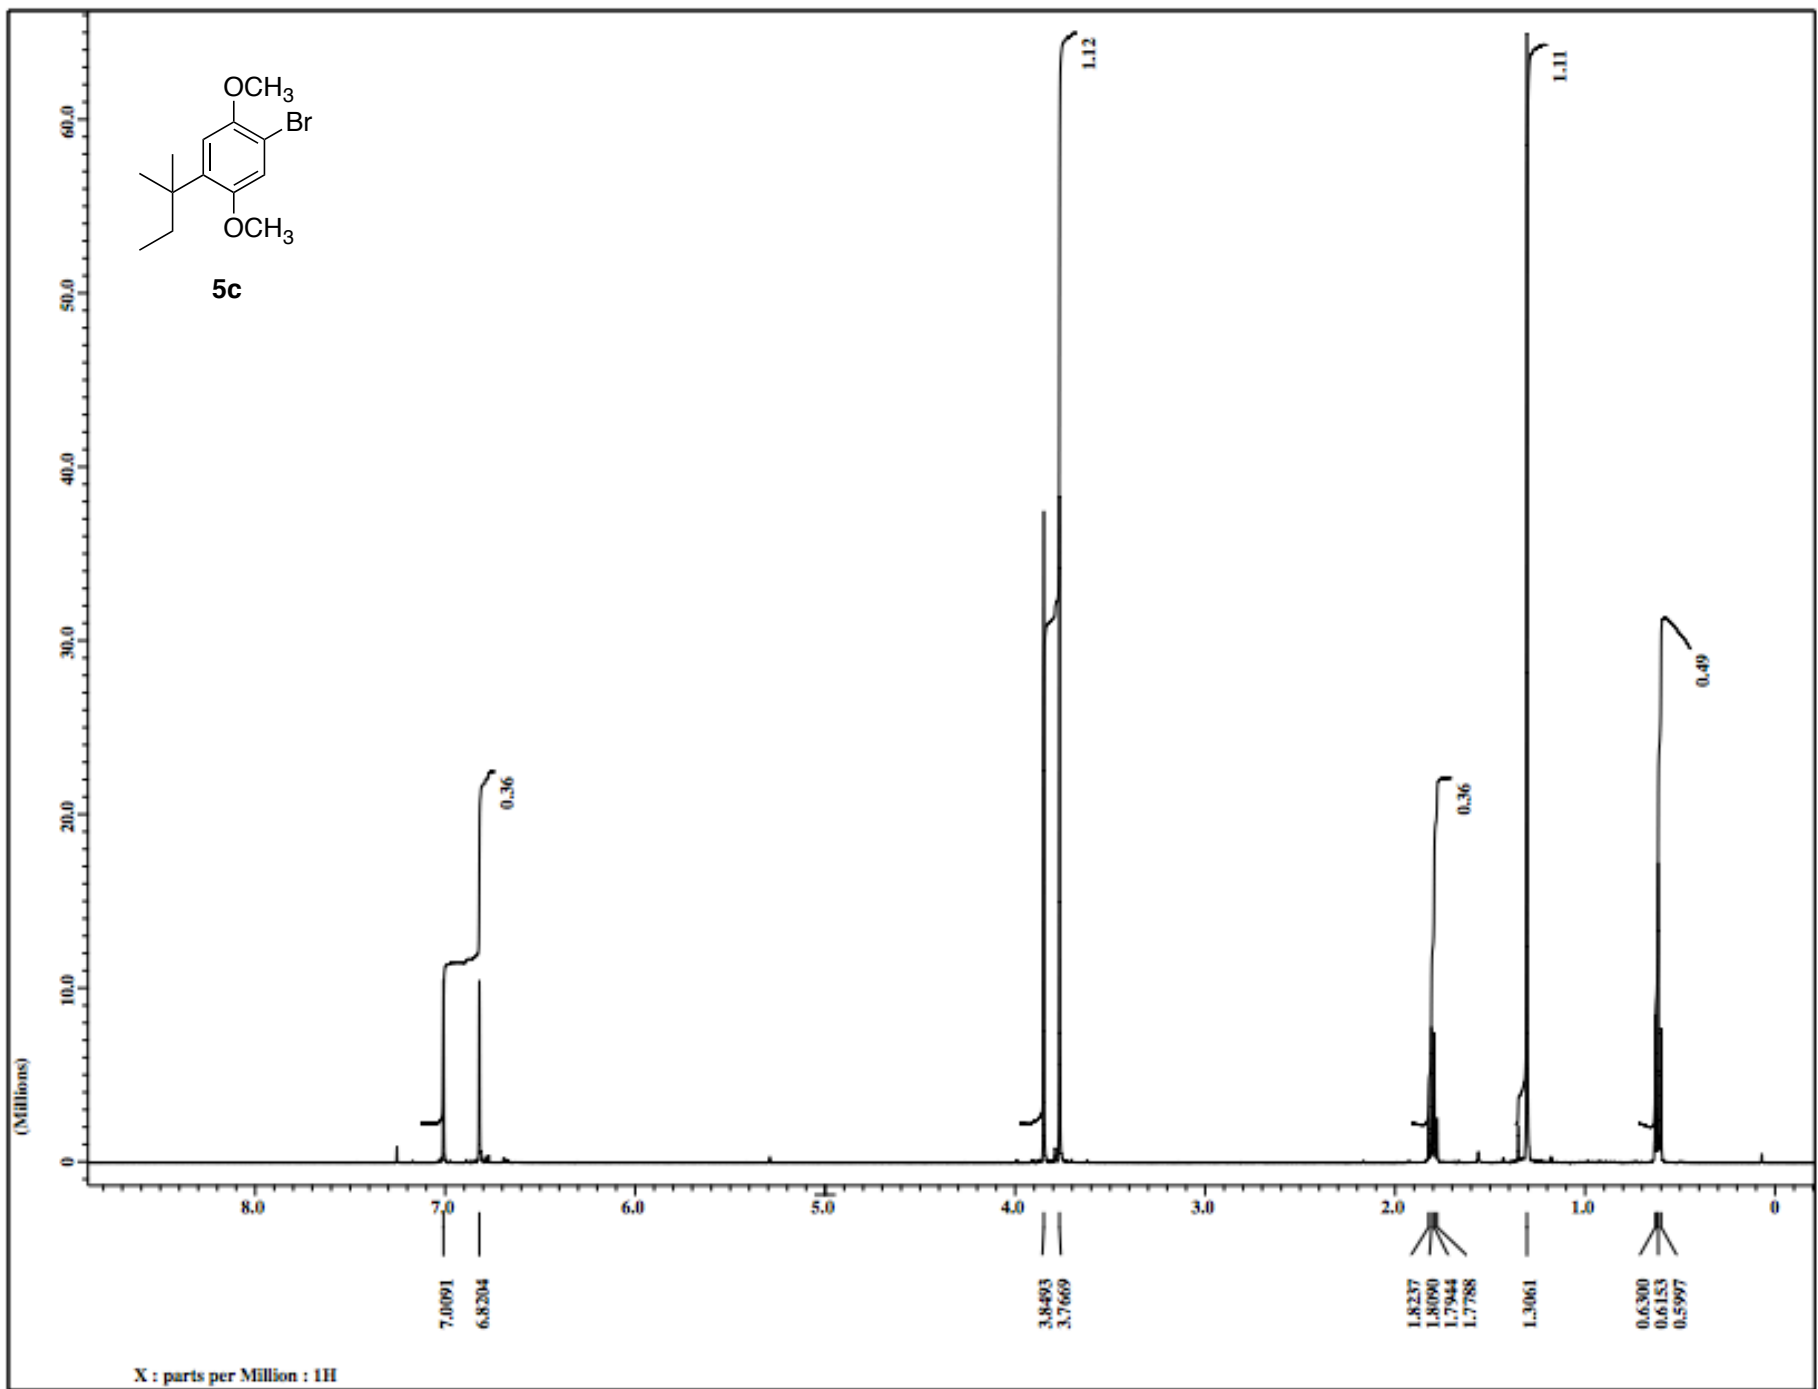

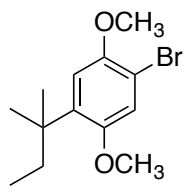

5c

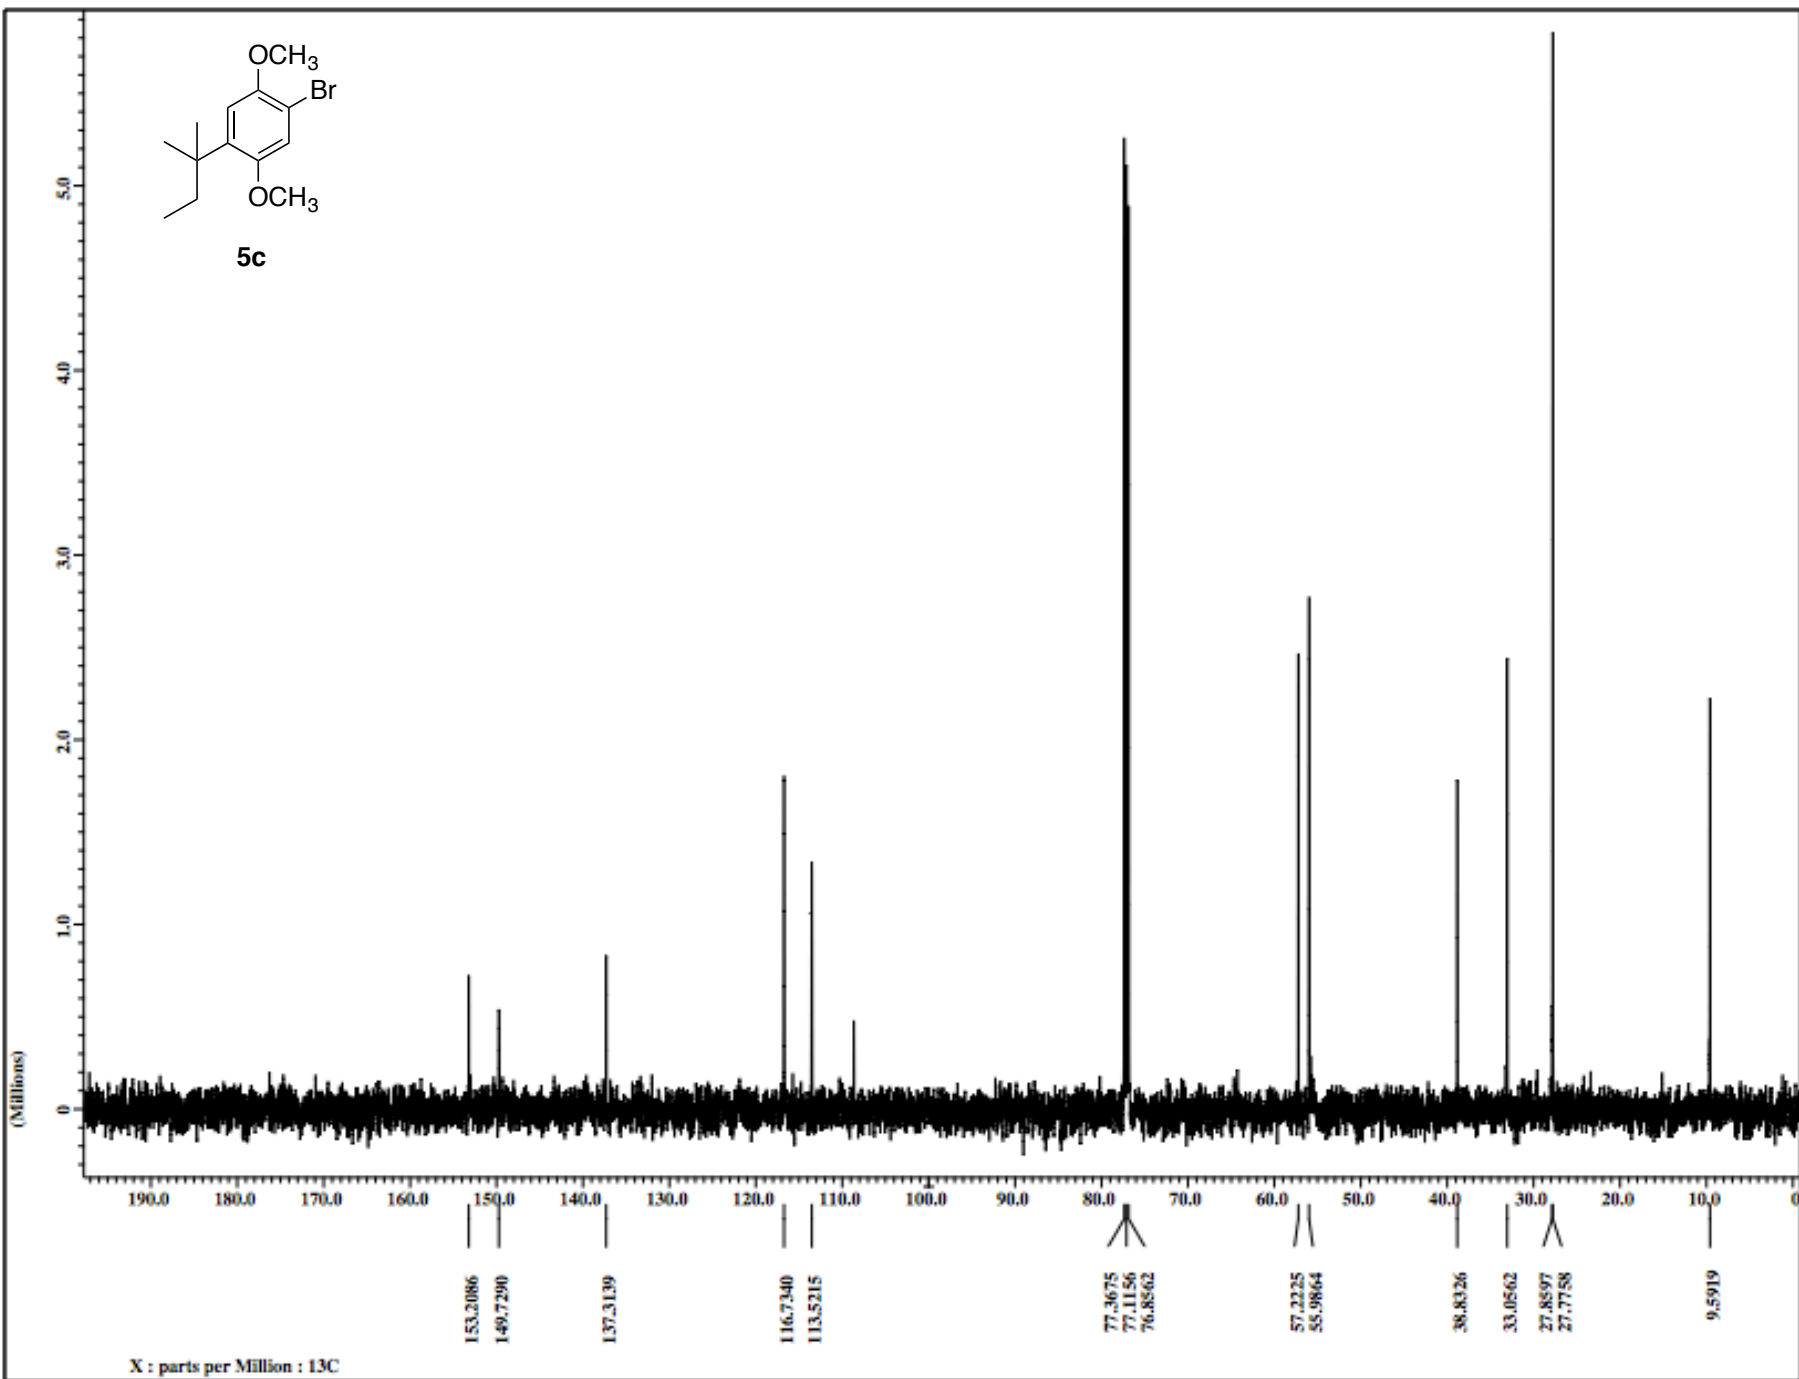

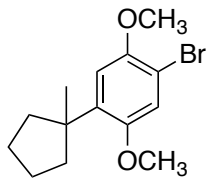

5d

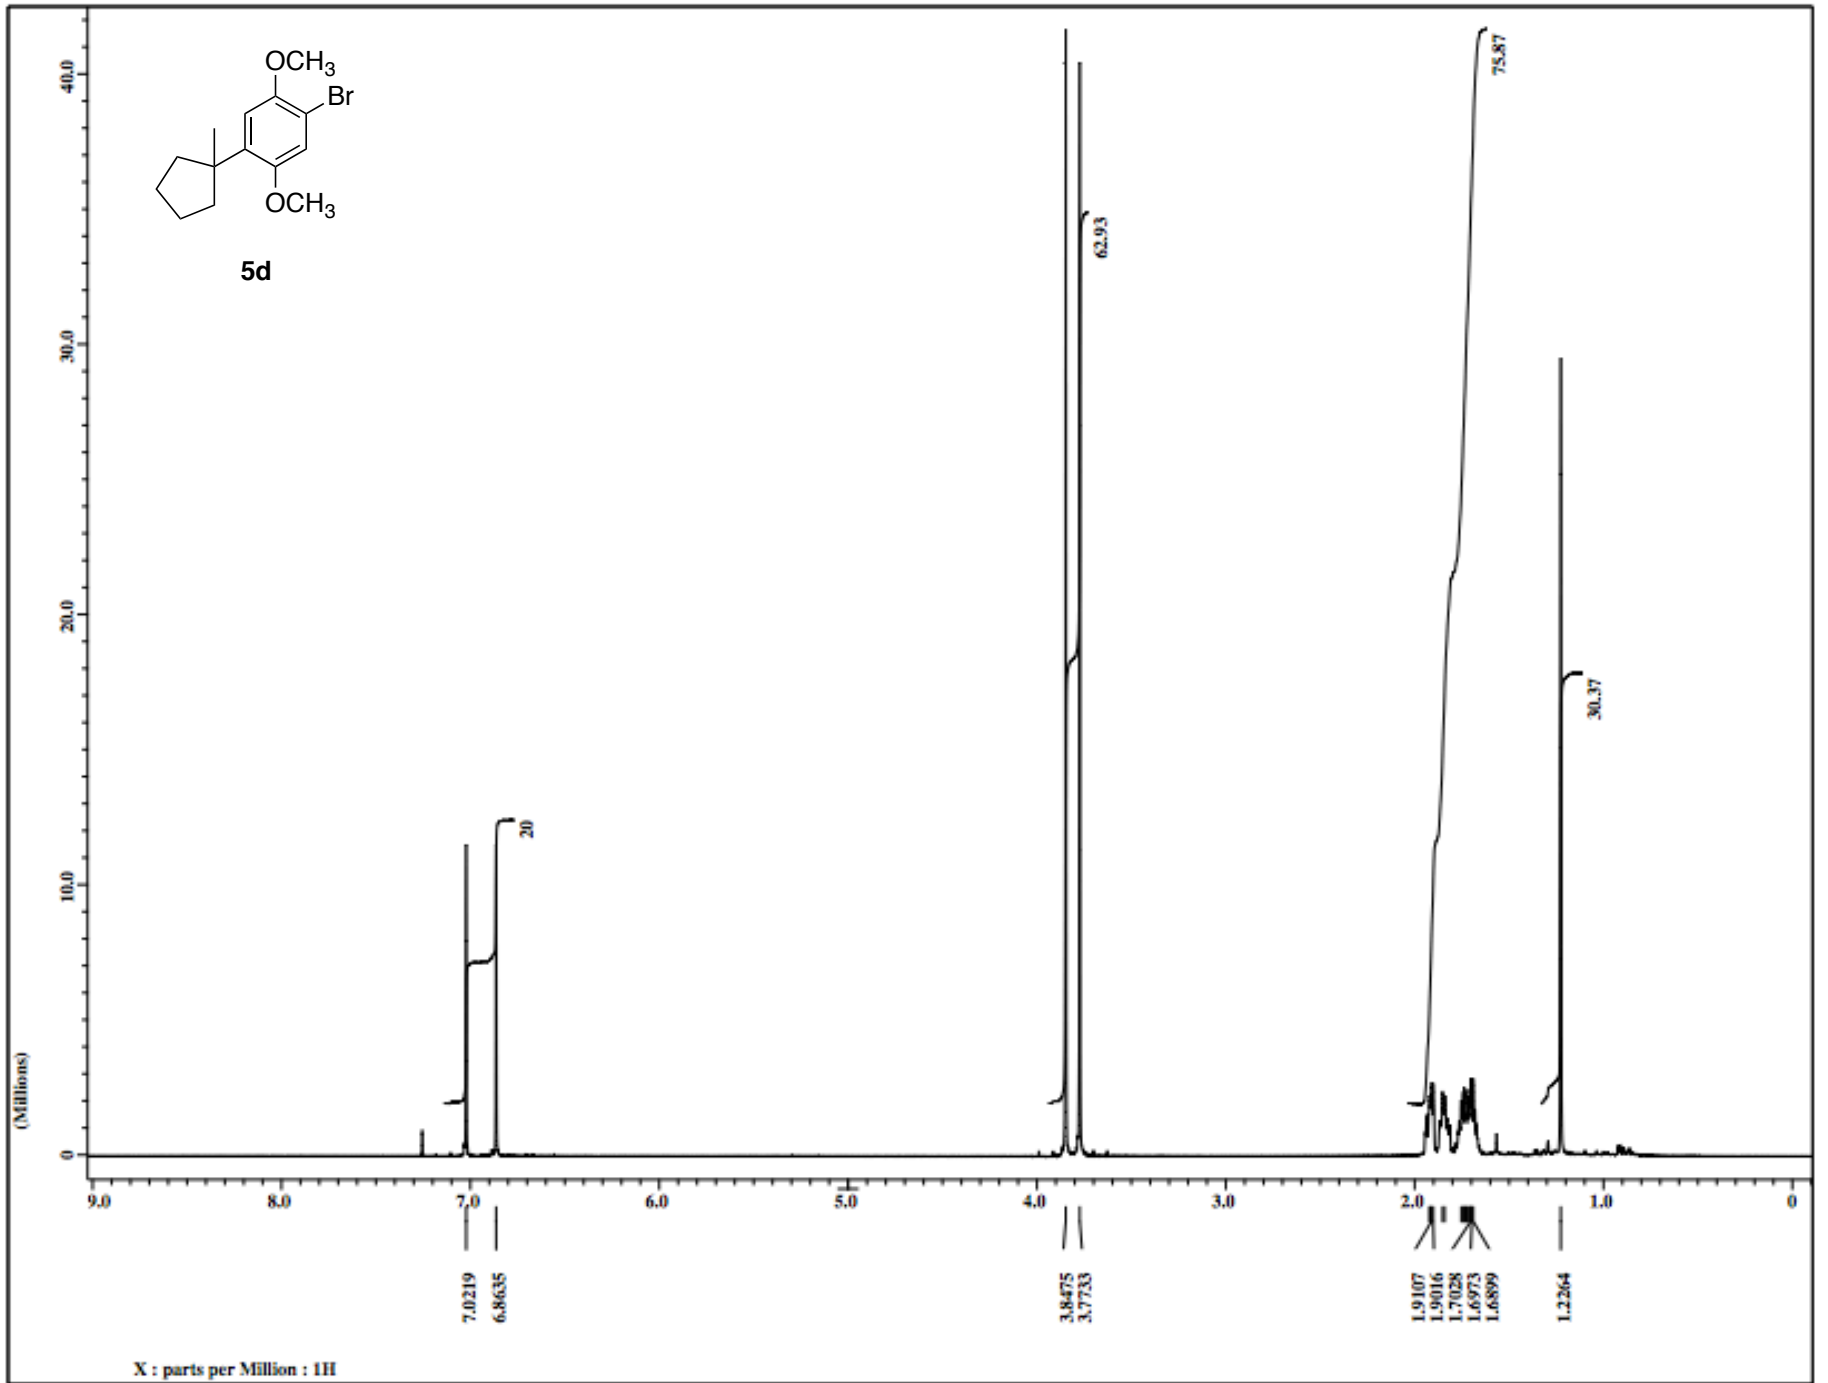

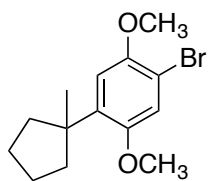

5d

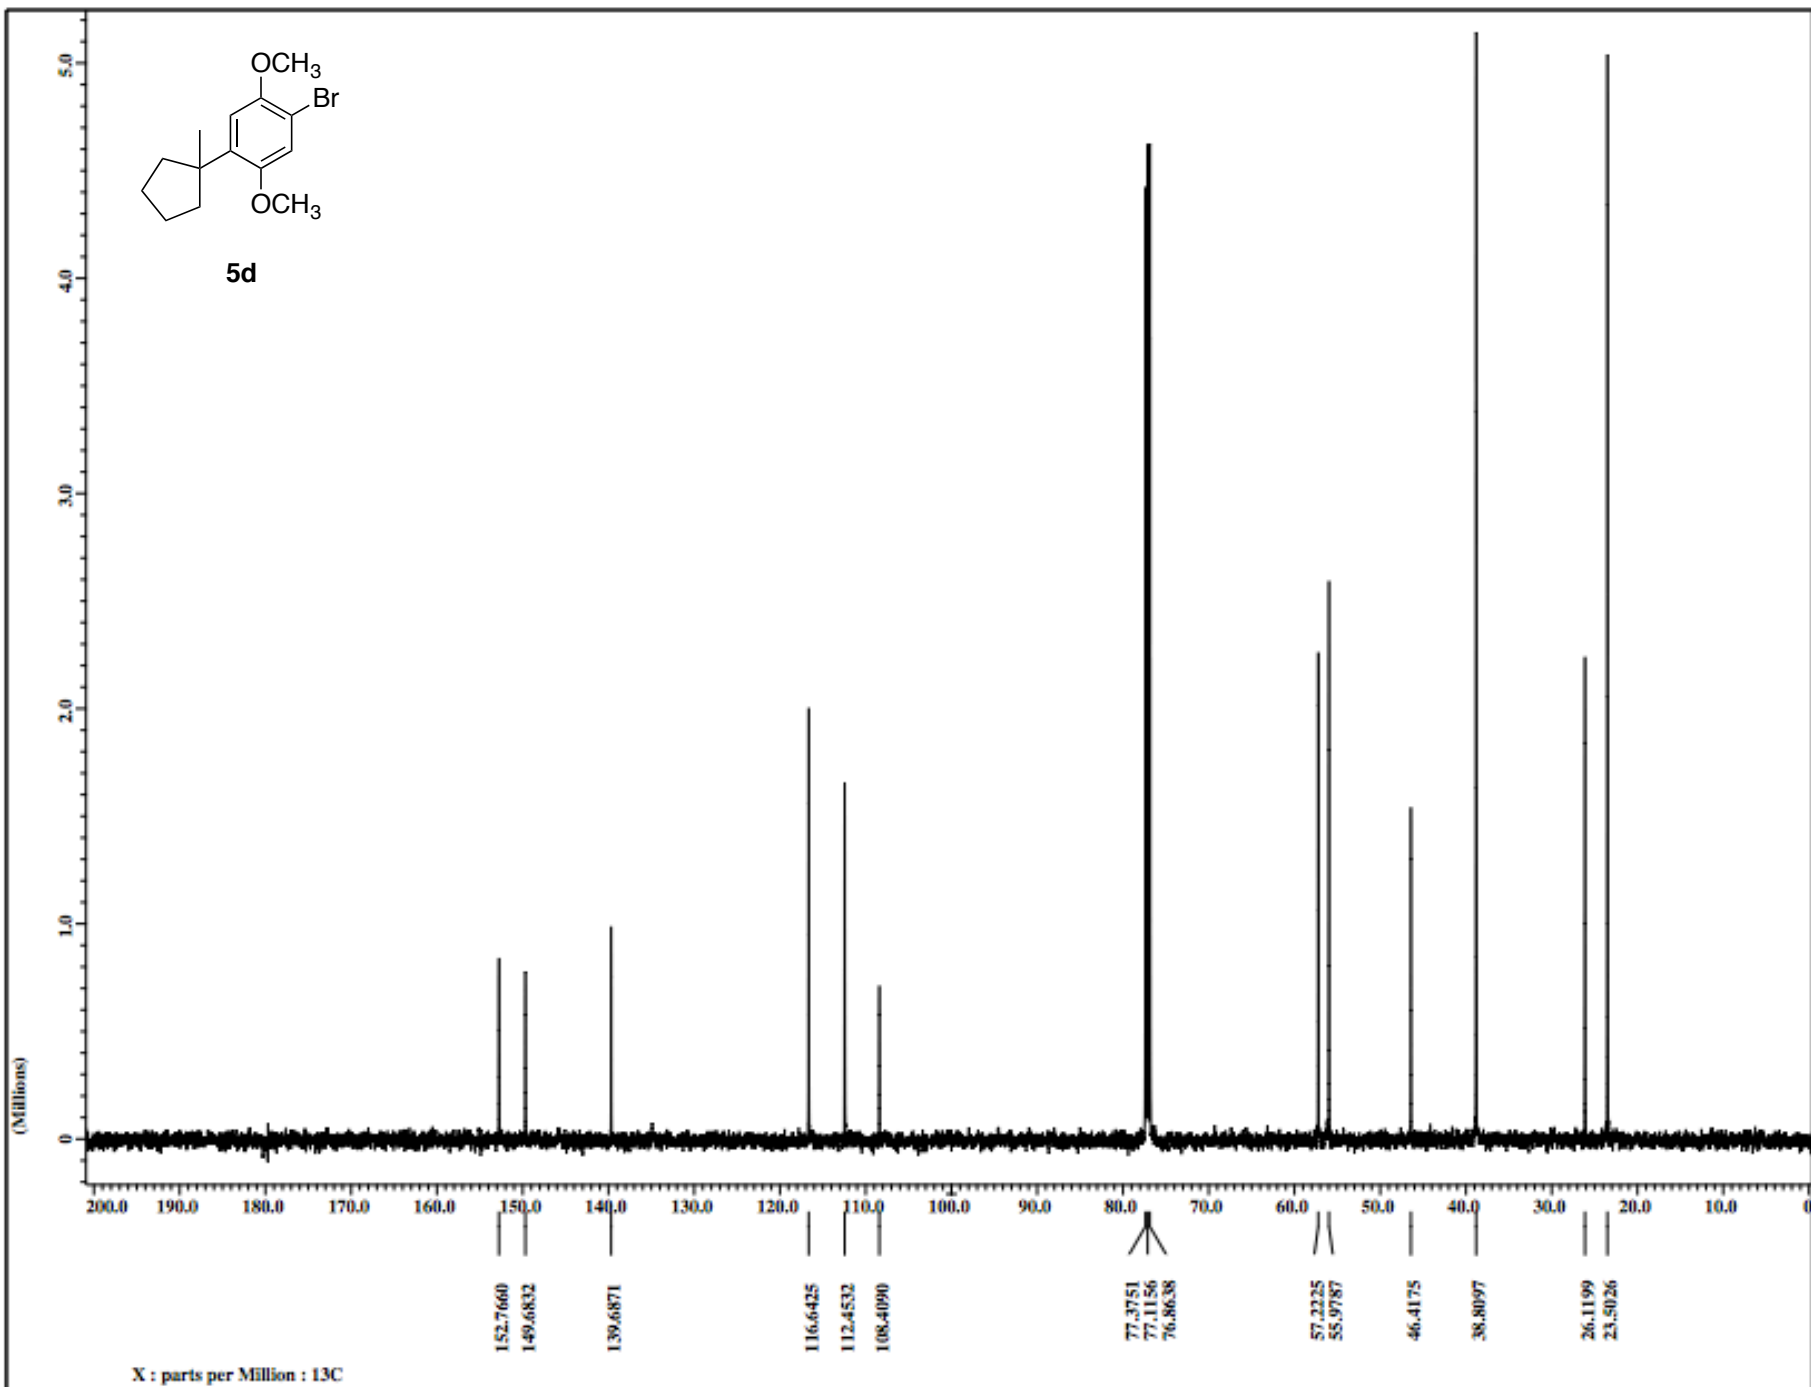

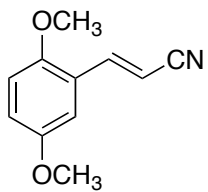

6

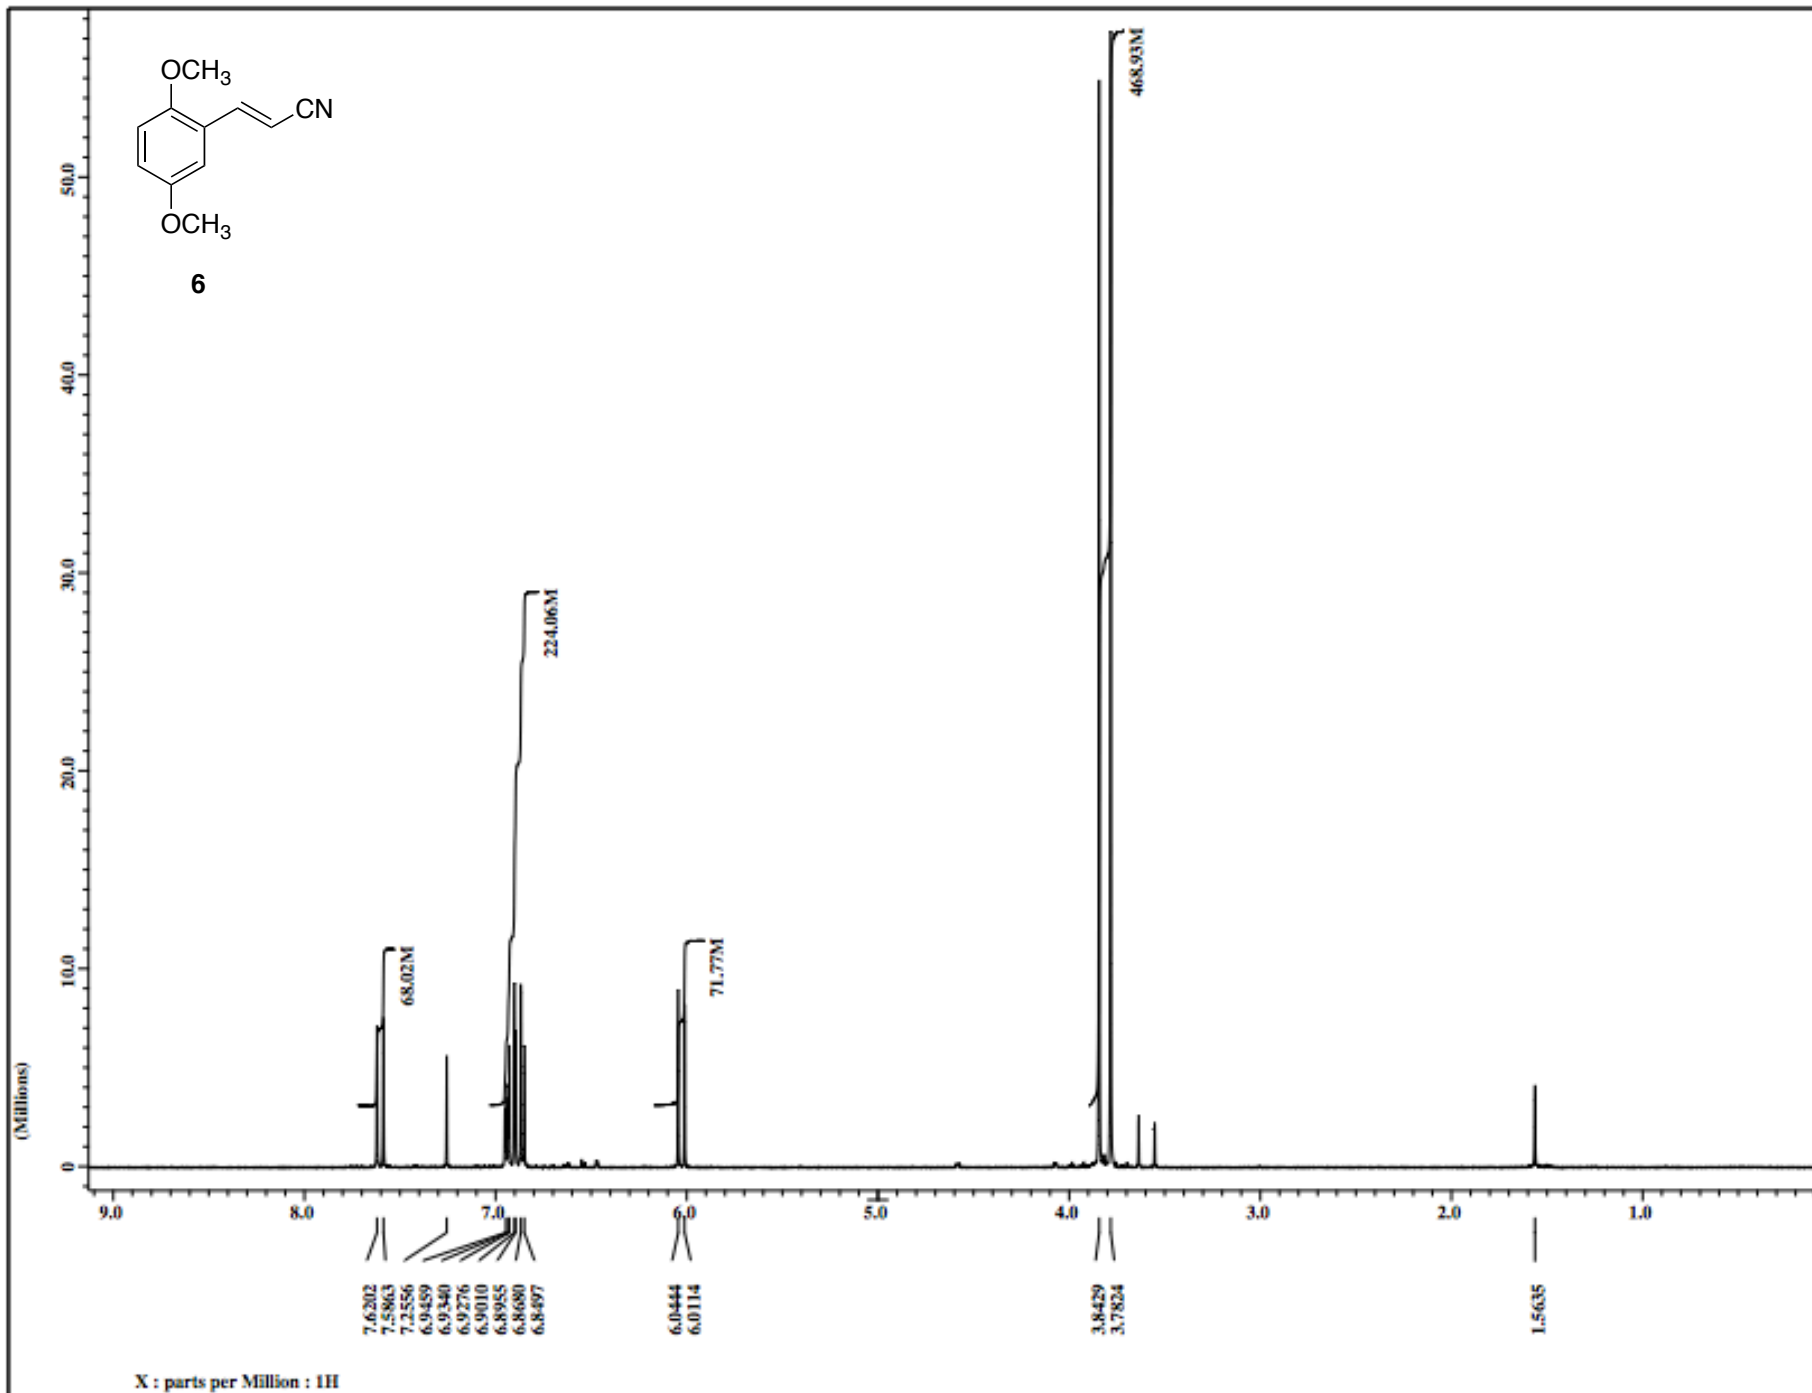



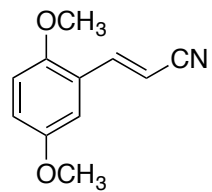

6

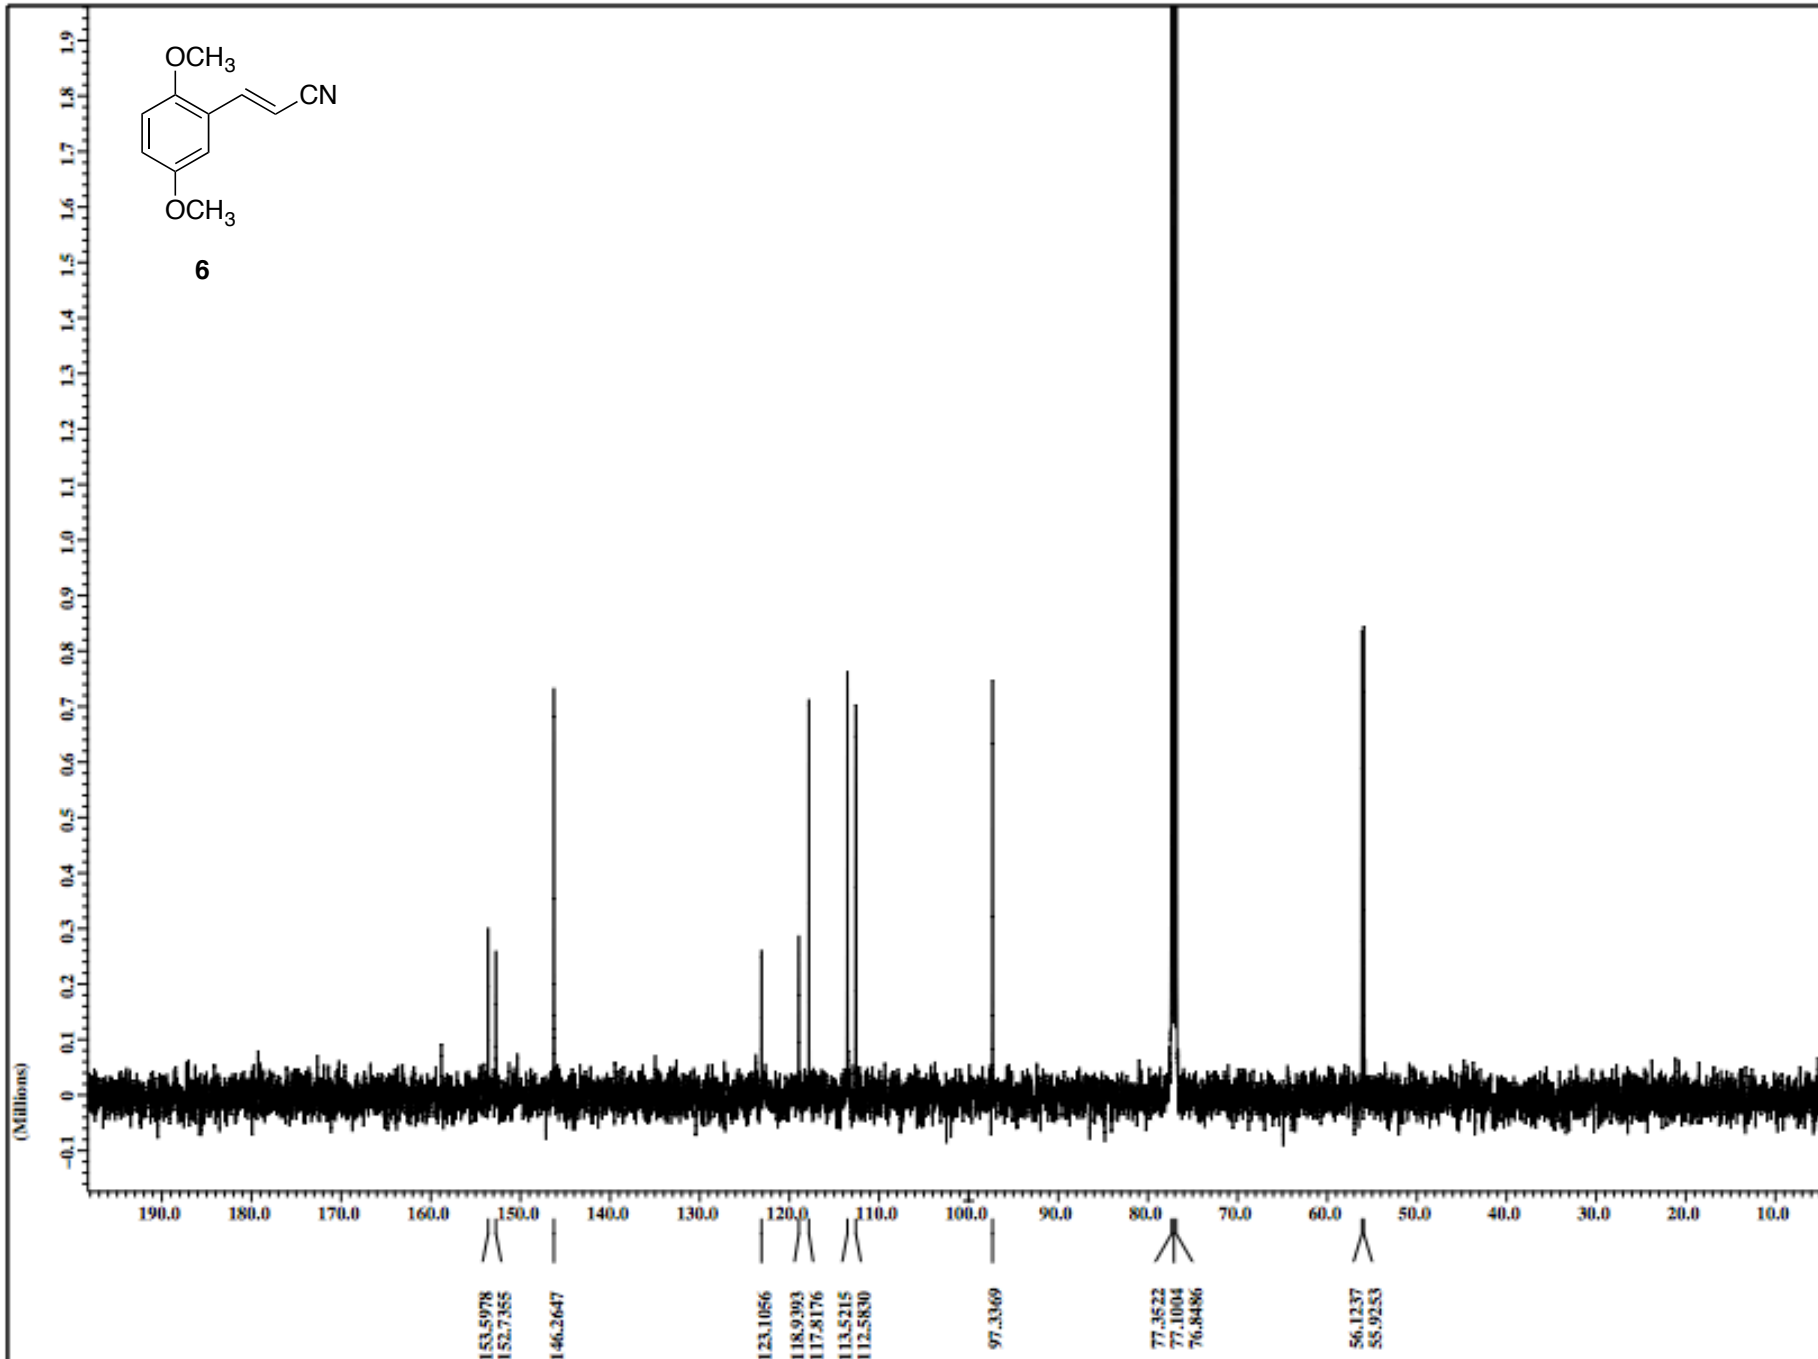

X : parts per Million : 13C

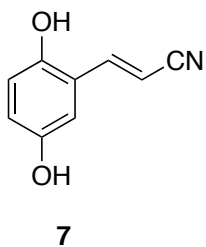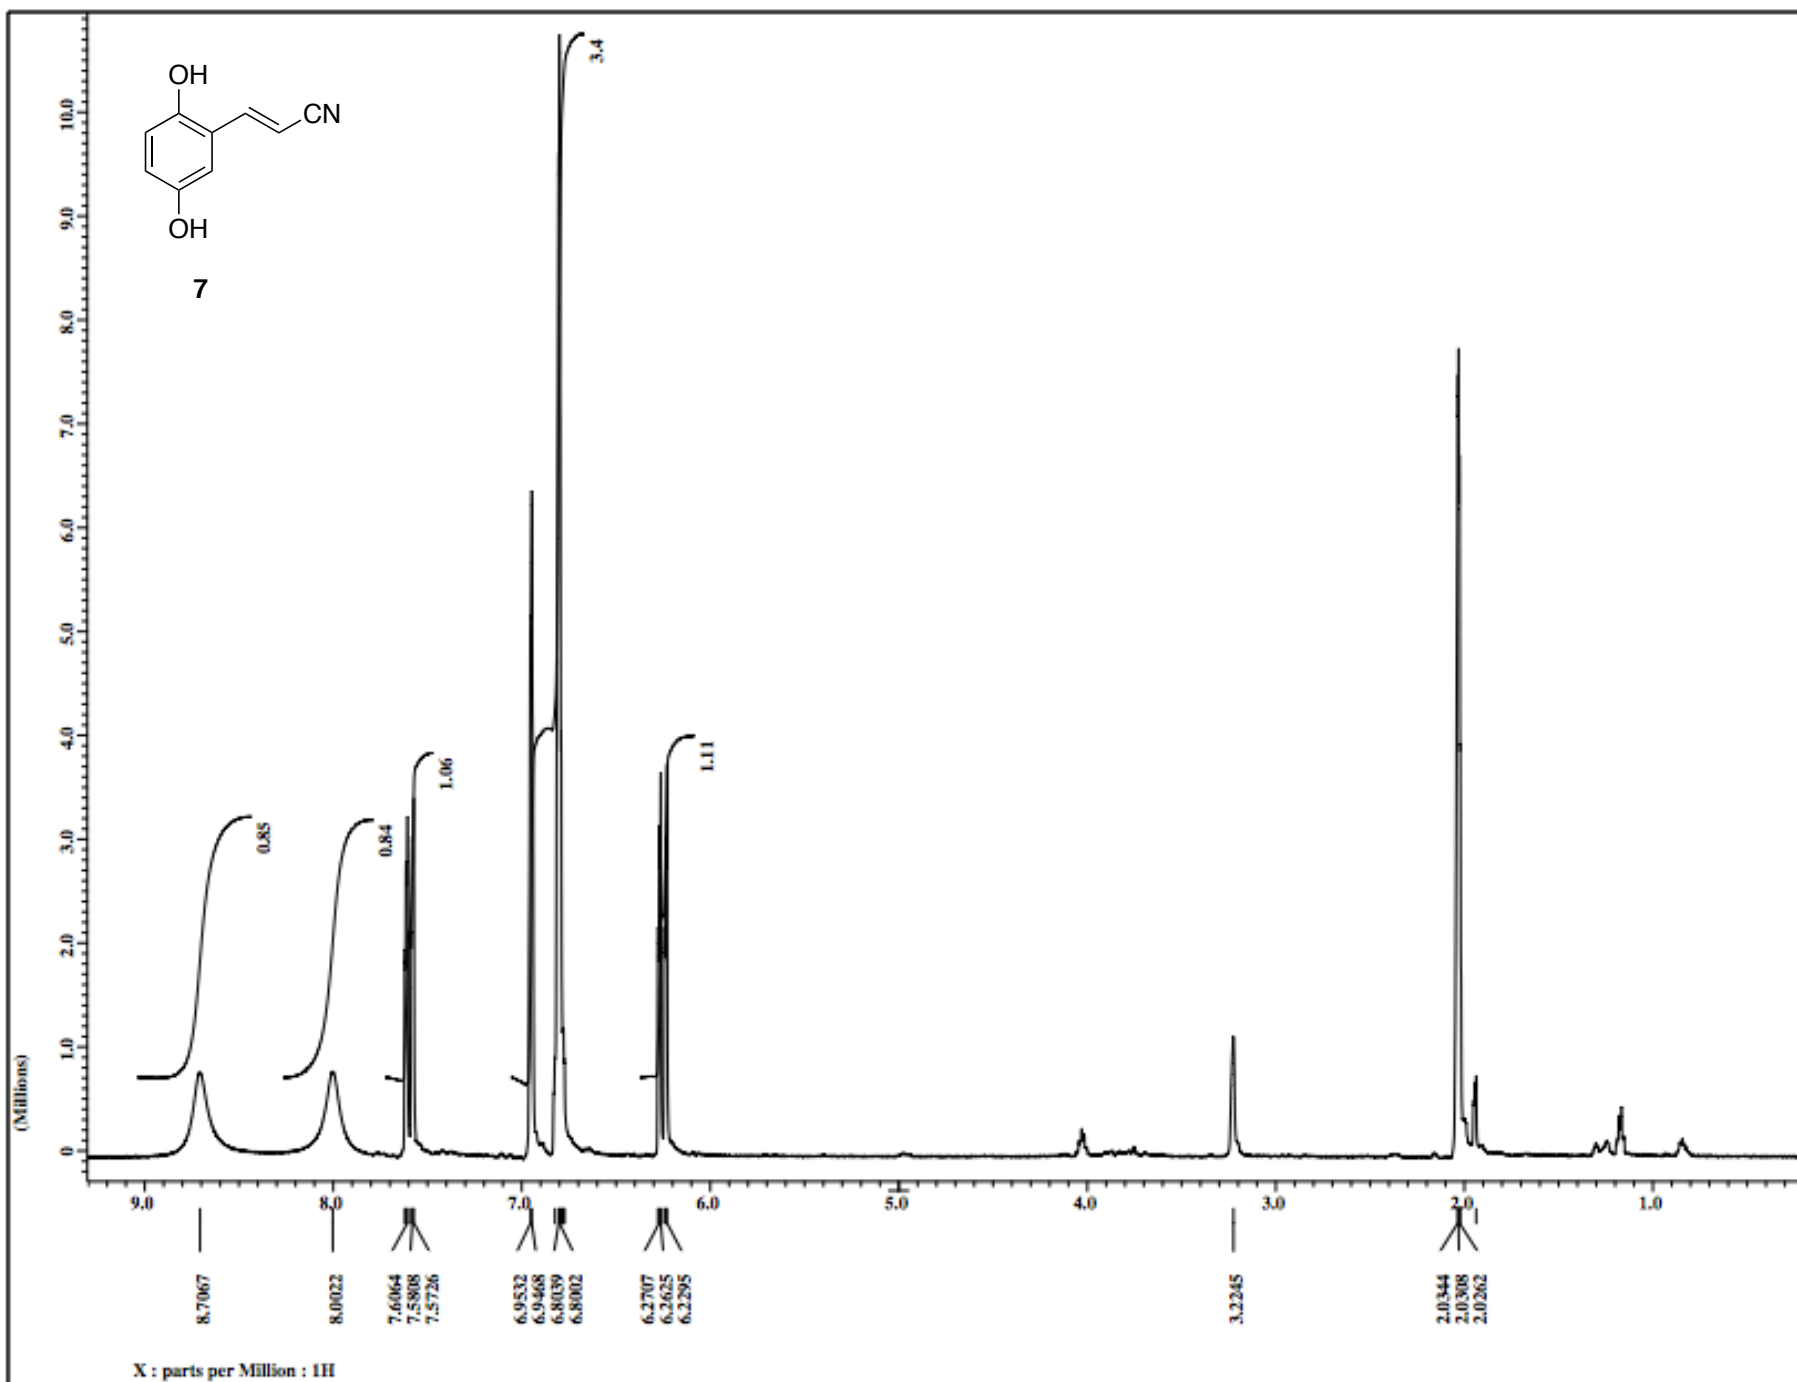

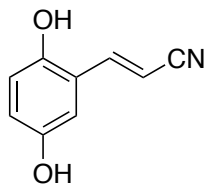

7

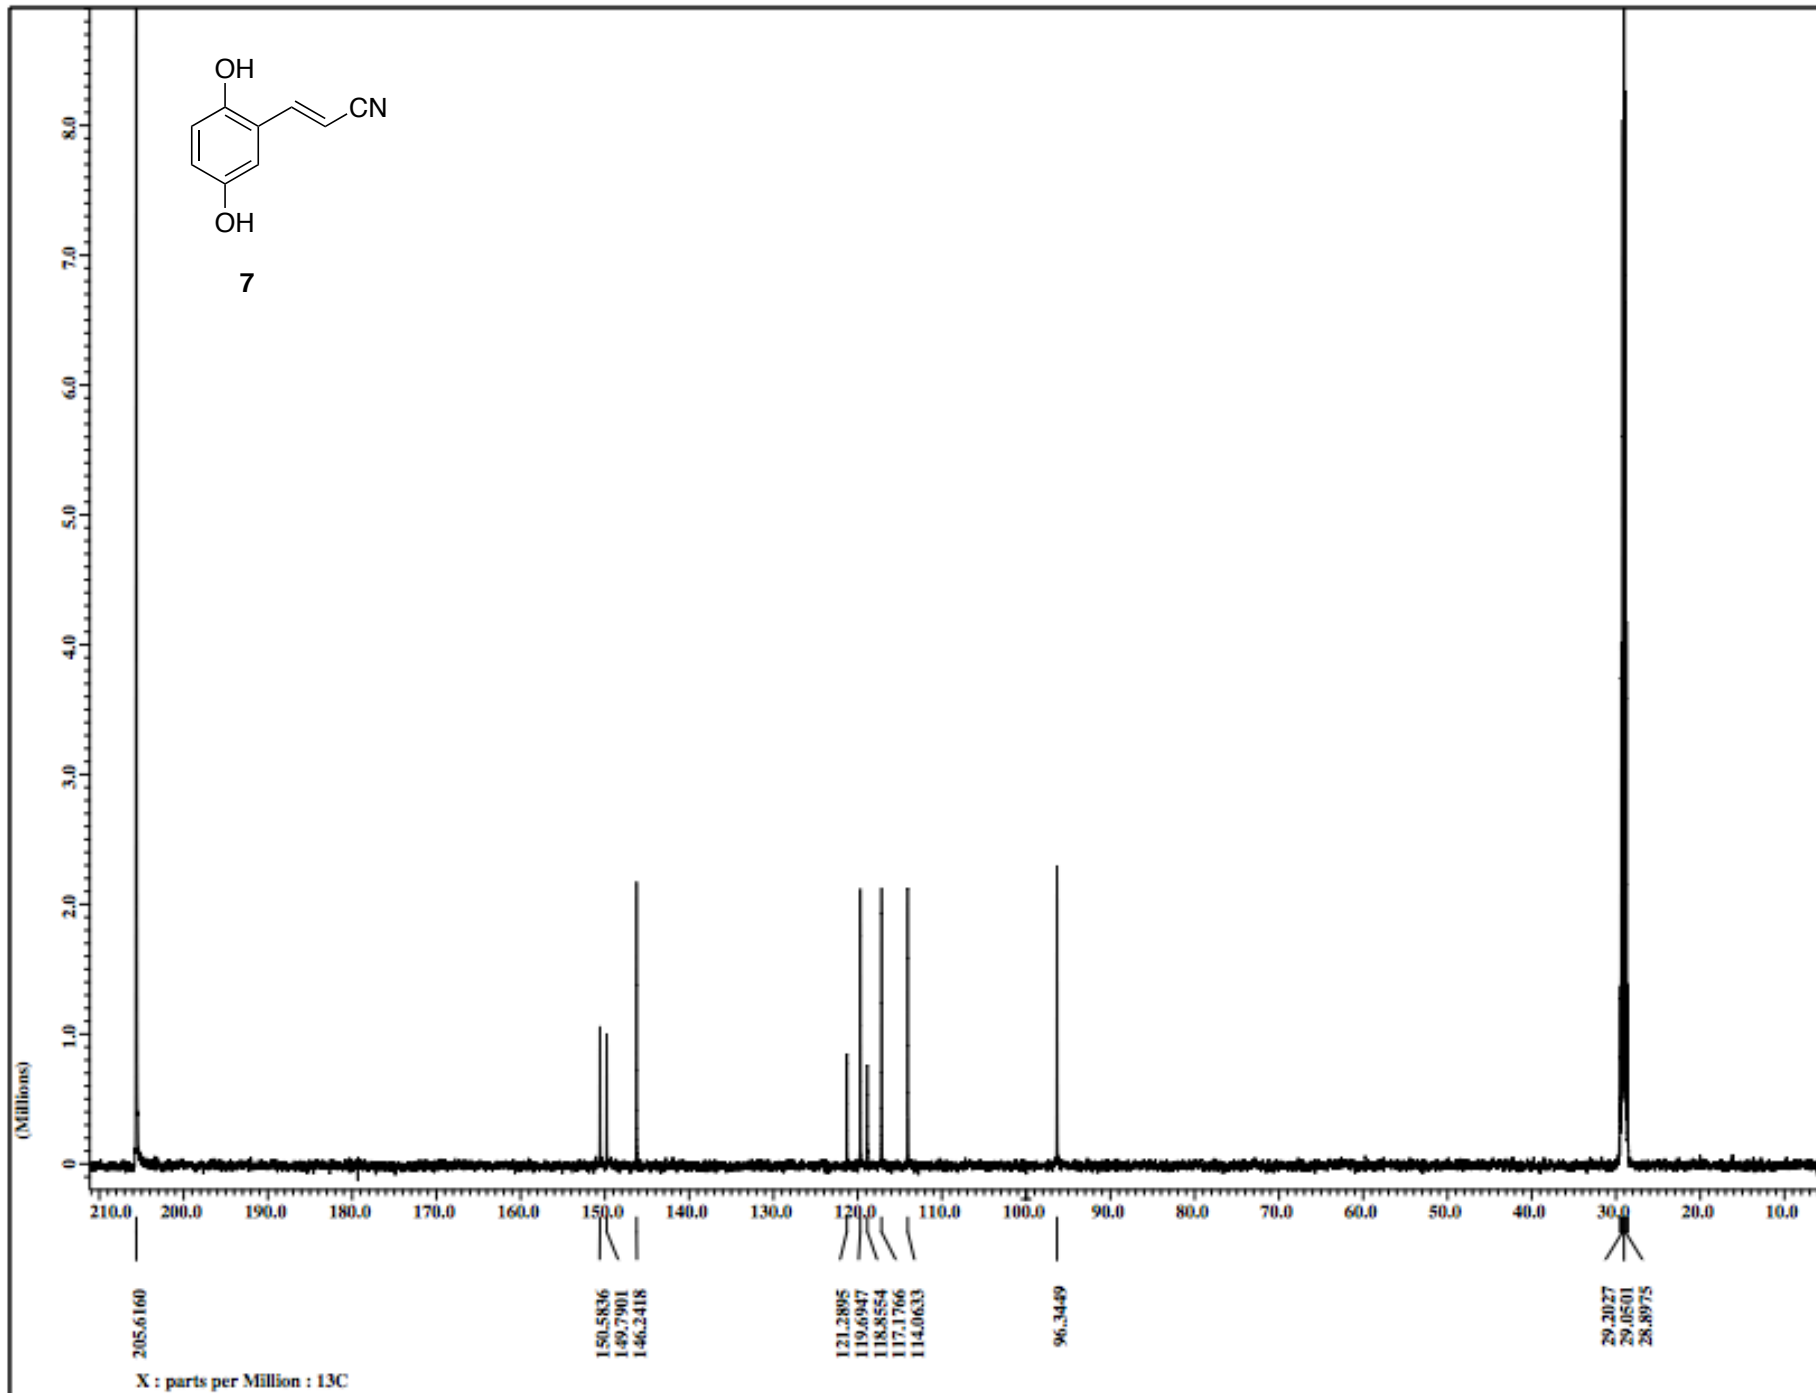

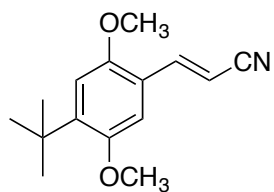

8

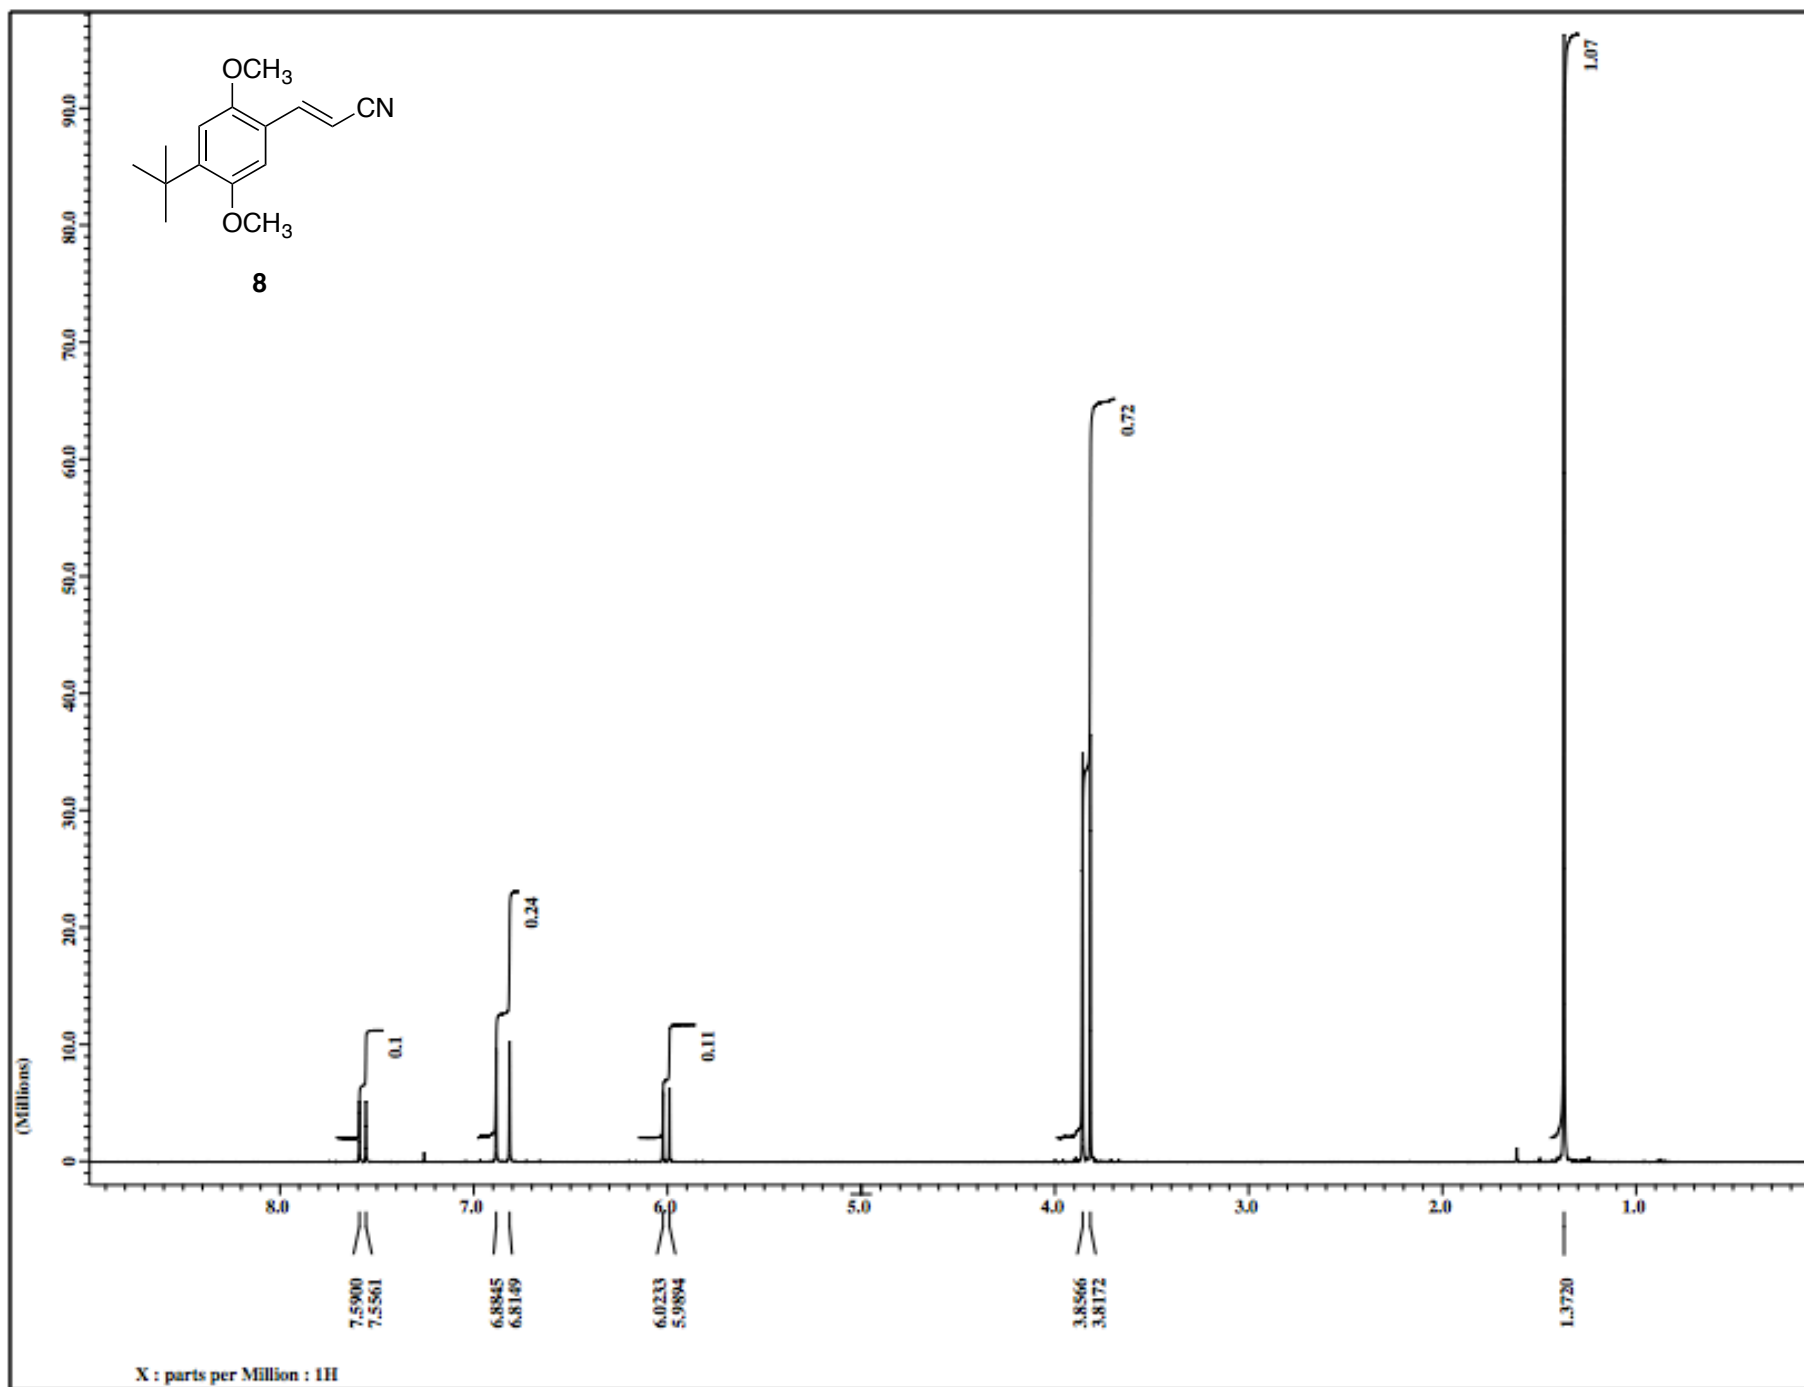

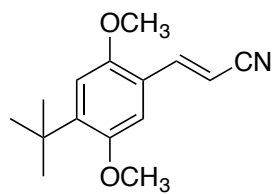

8

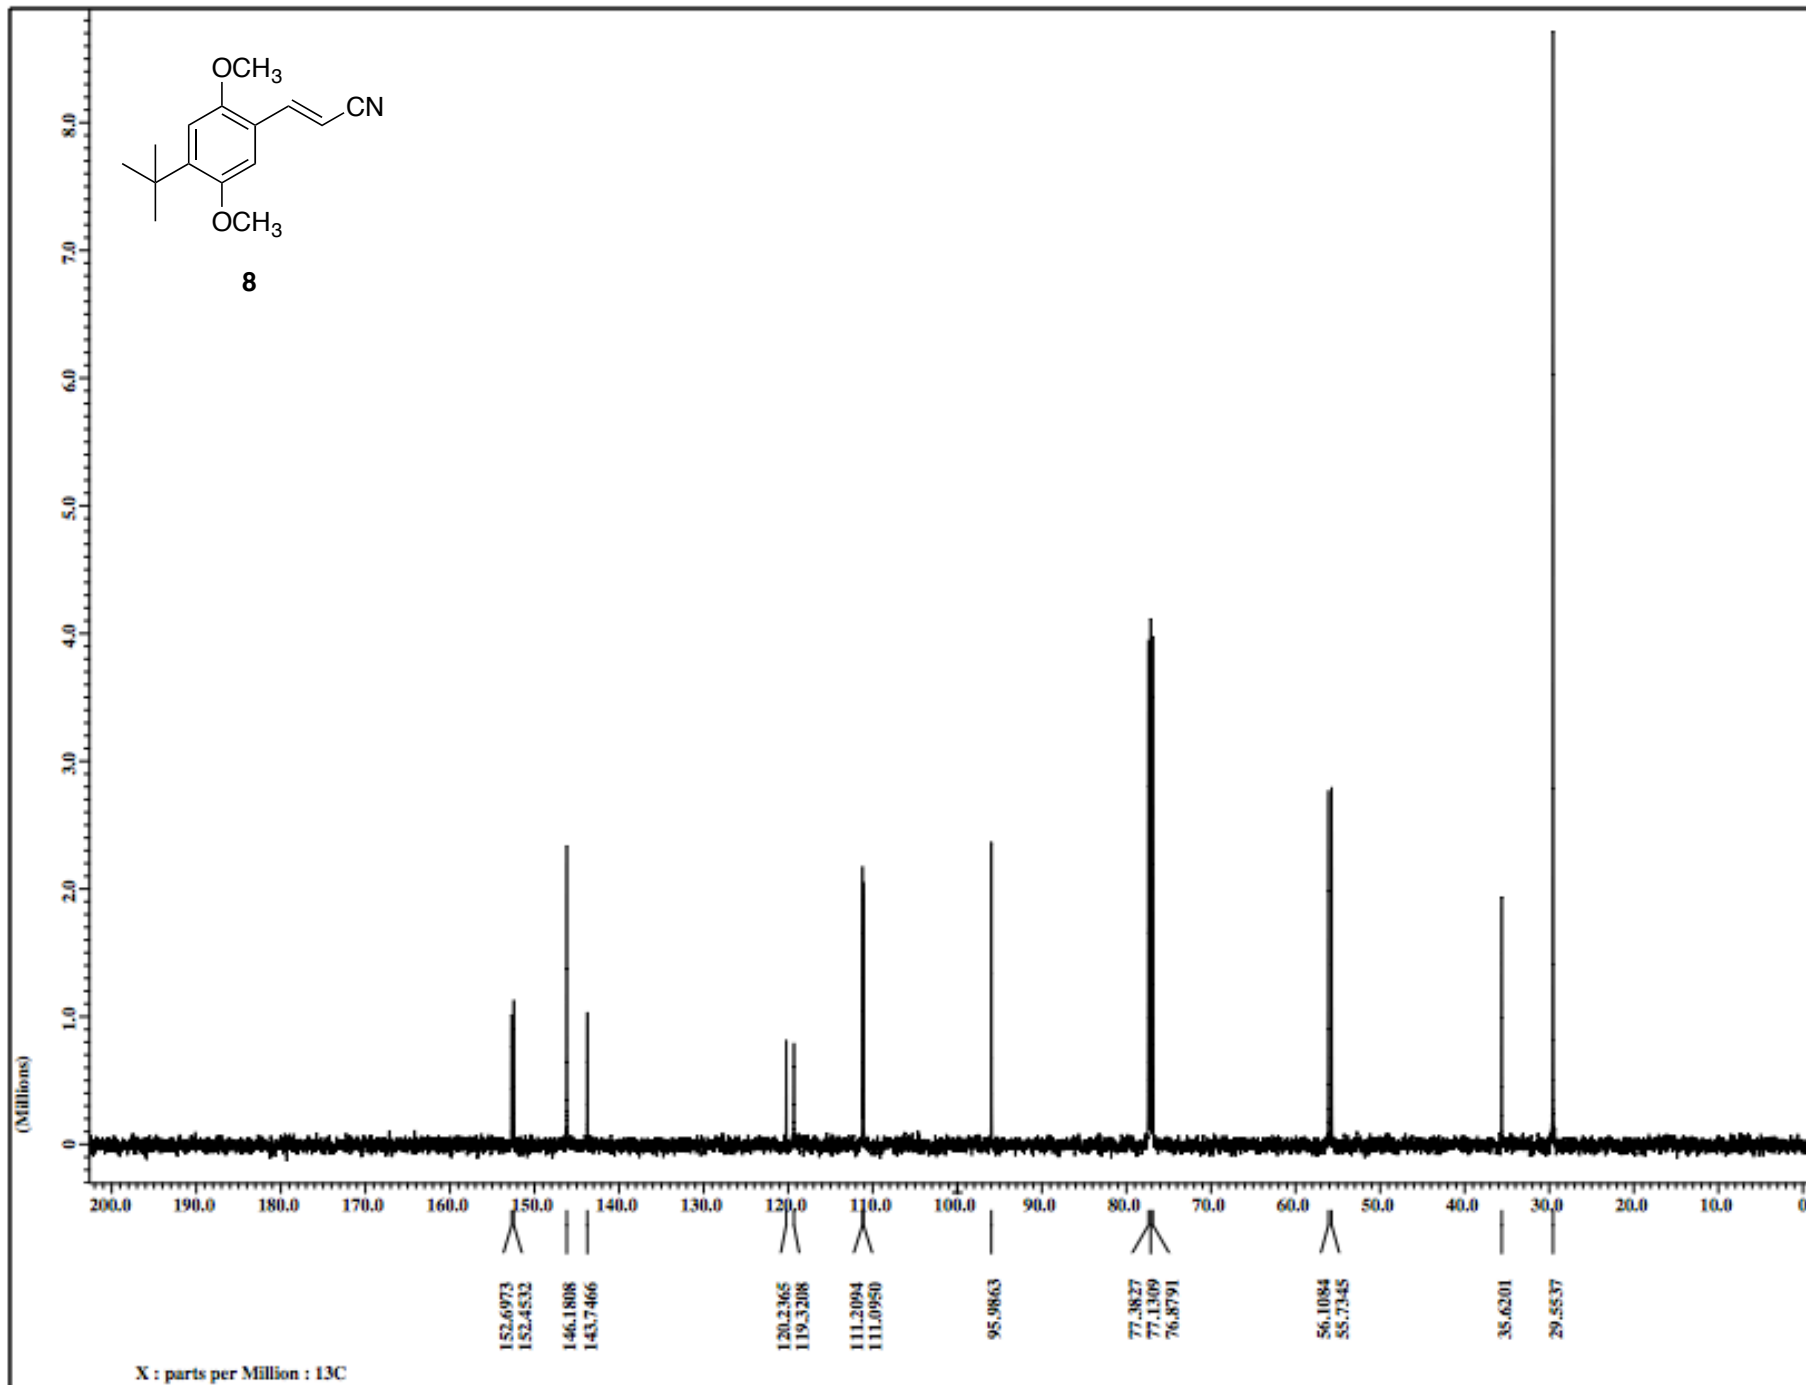

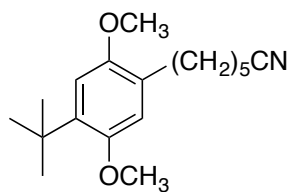

10

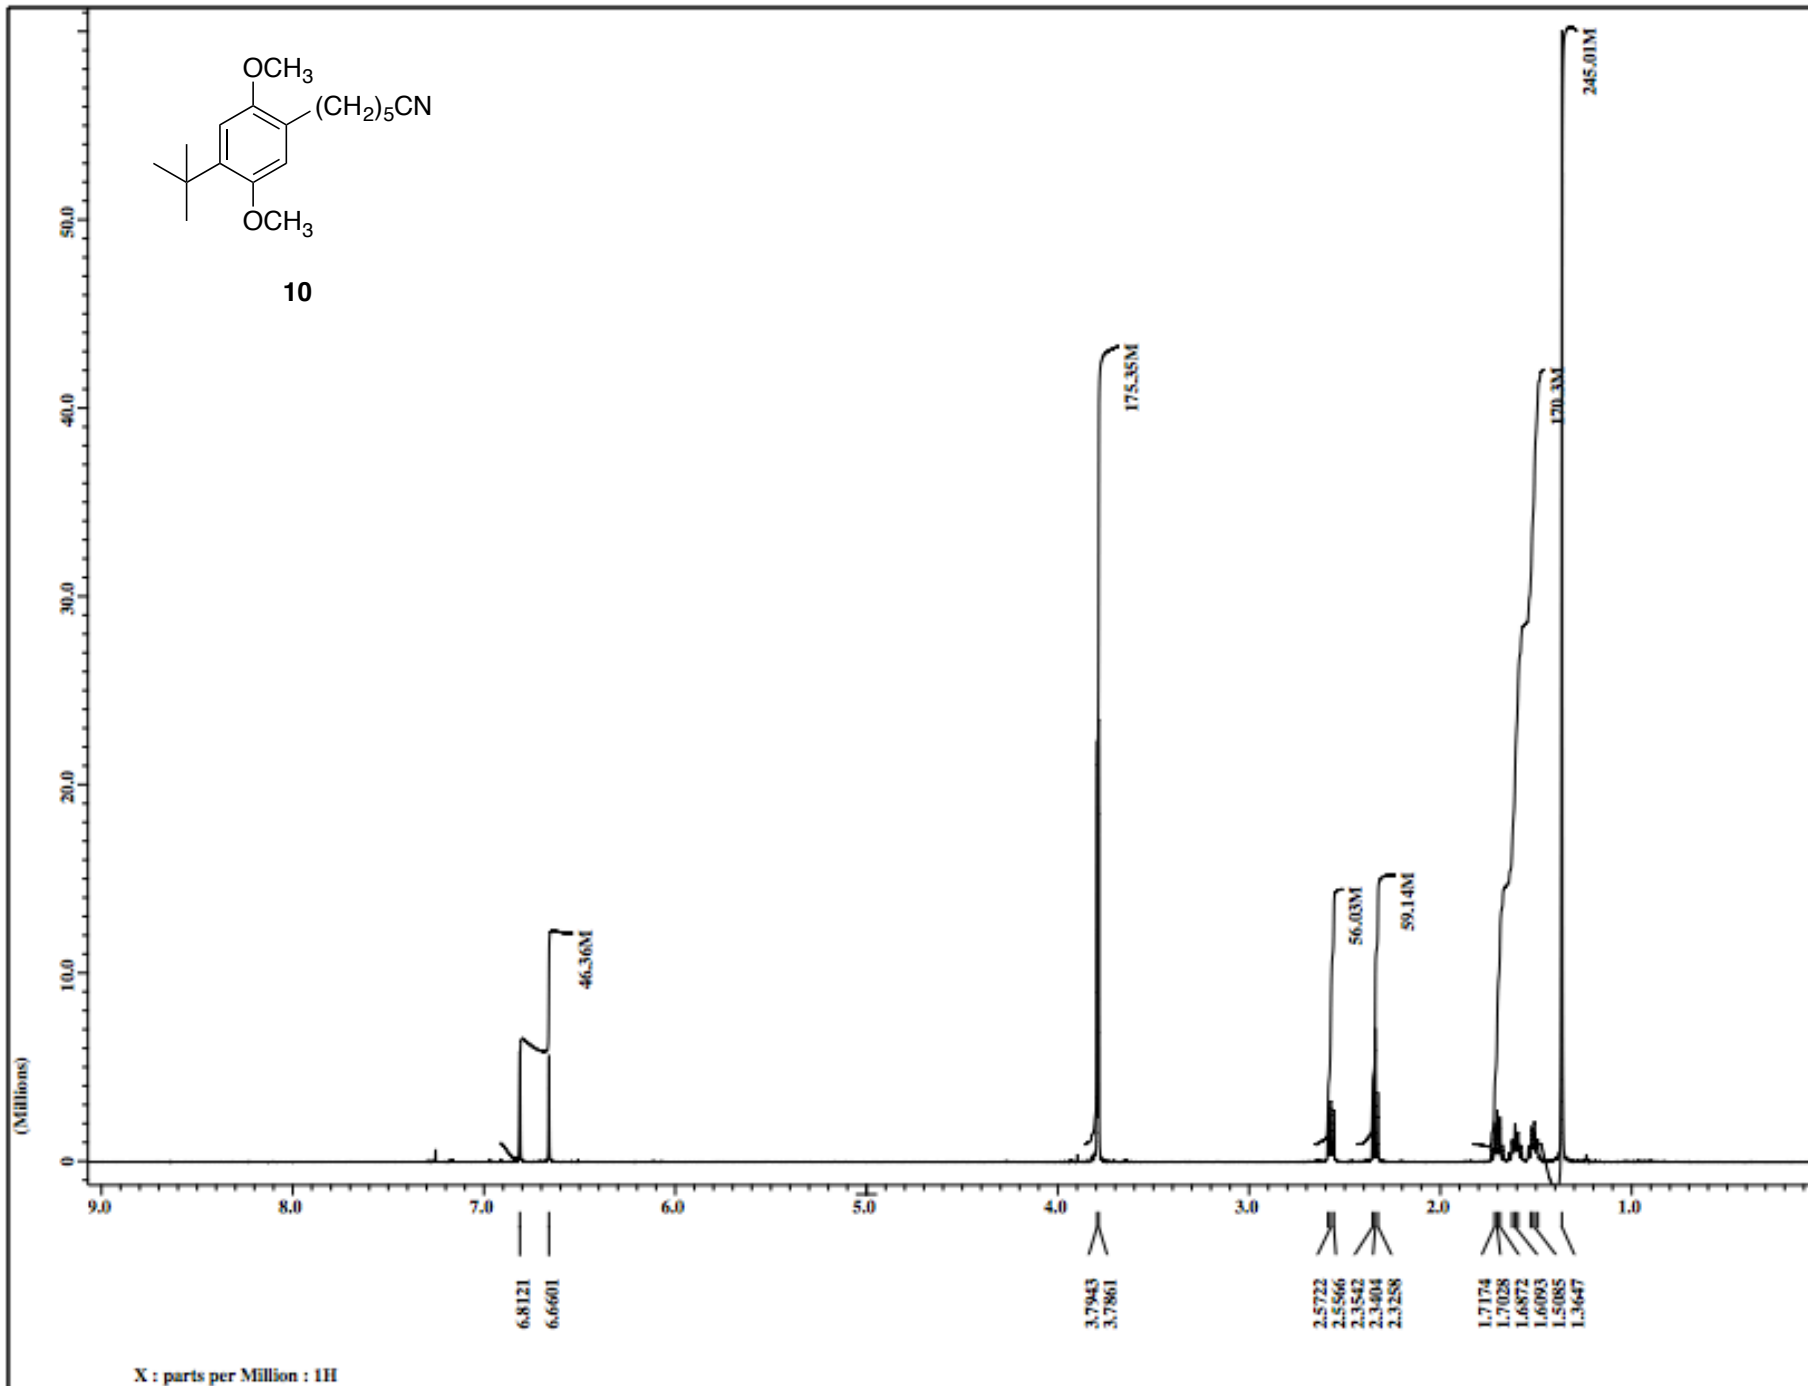

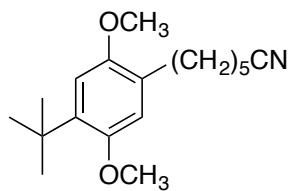

10

(Millions)

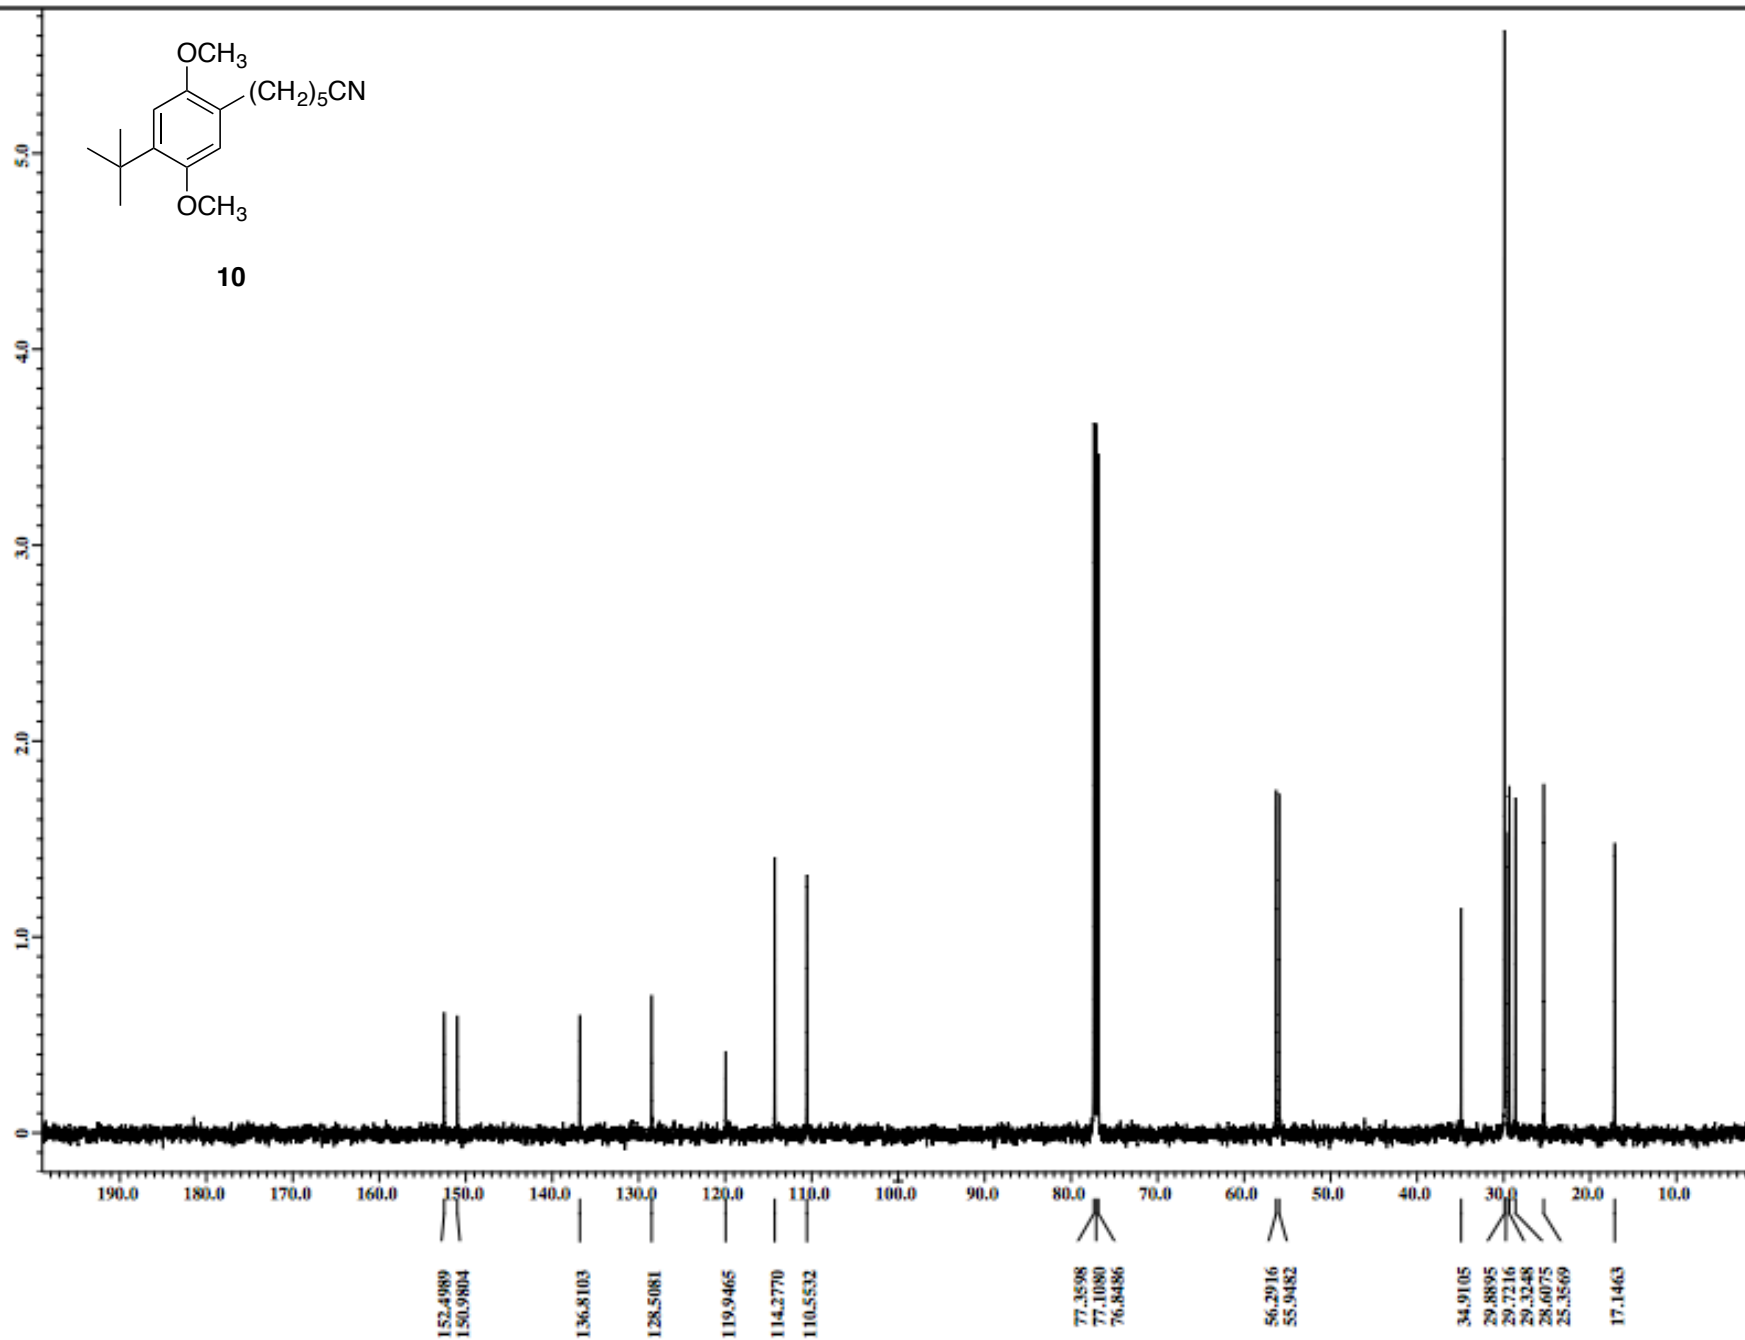

X : parts per Million : 13C

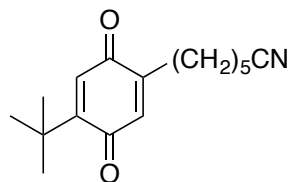

11

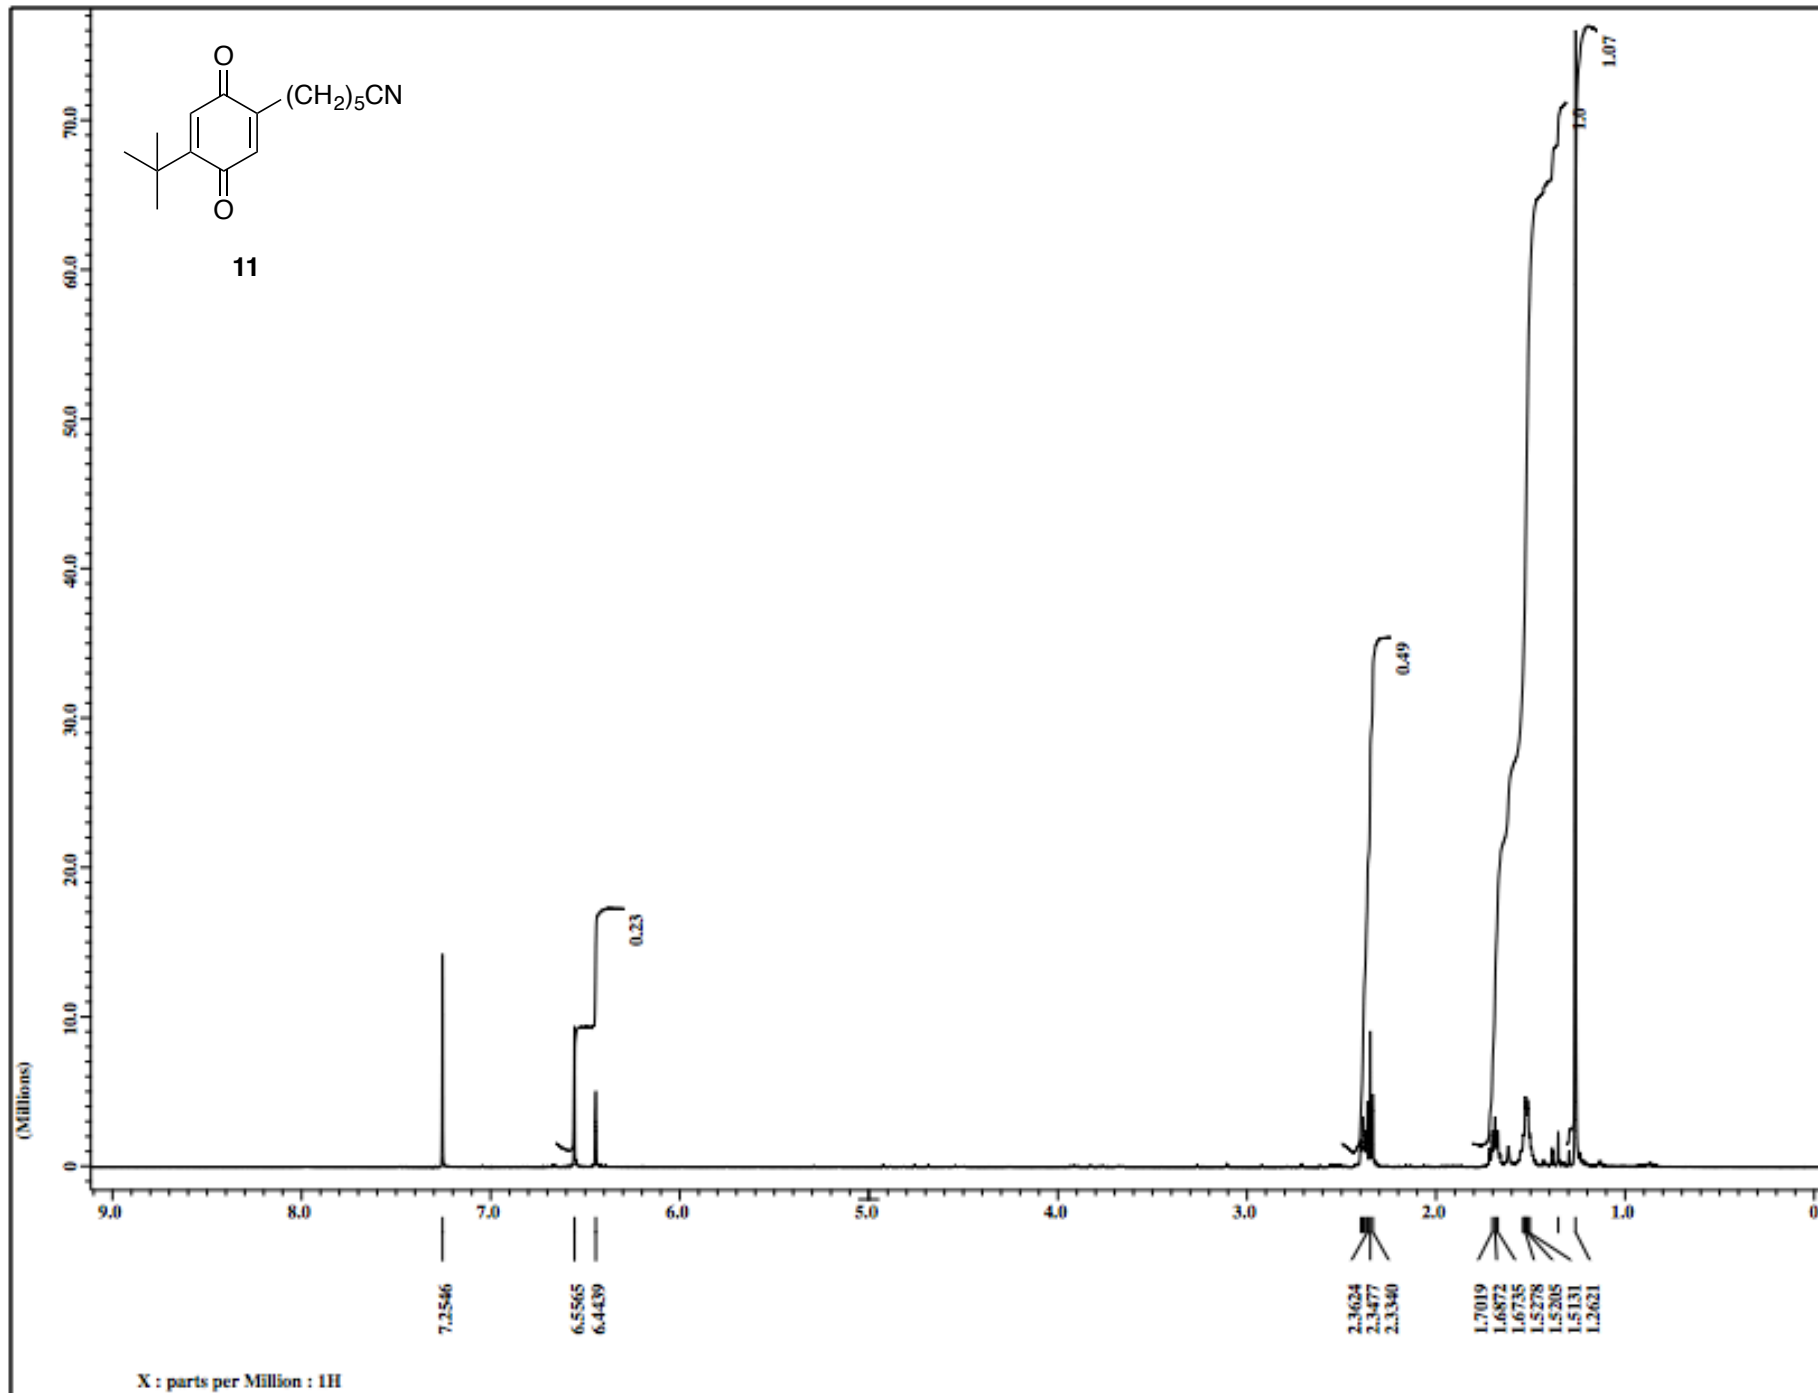



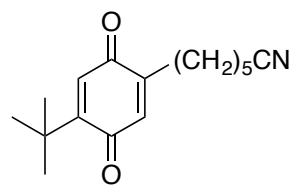

11

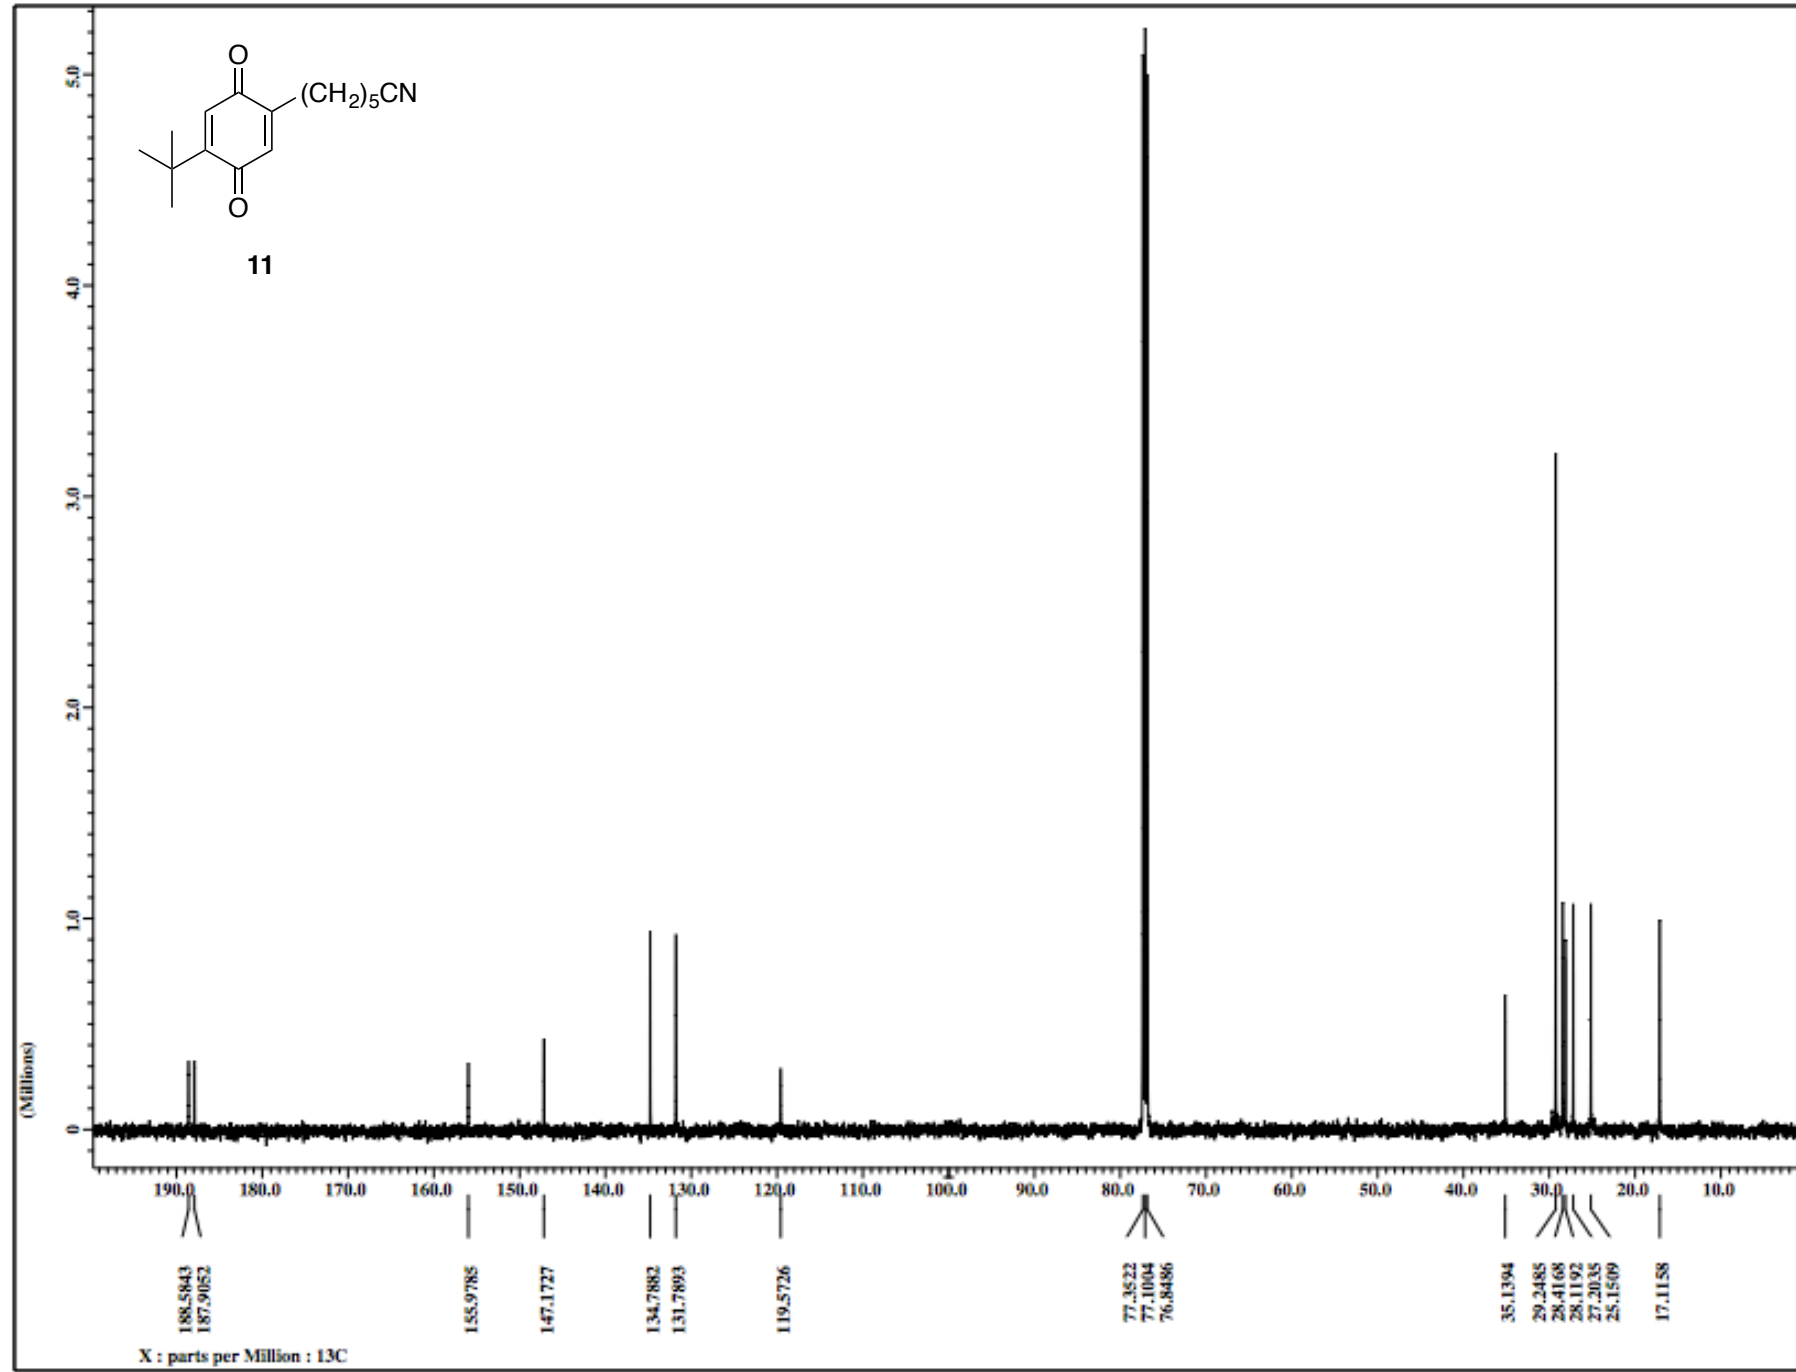

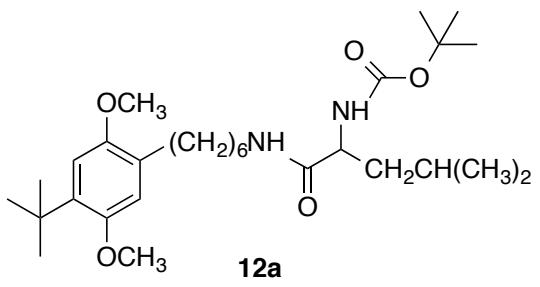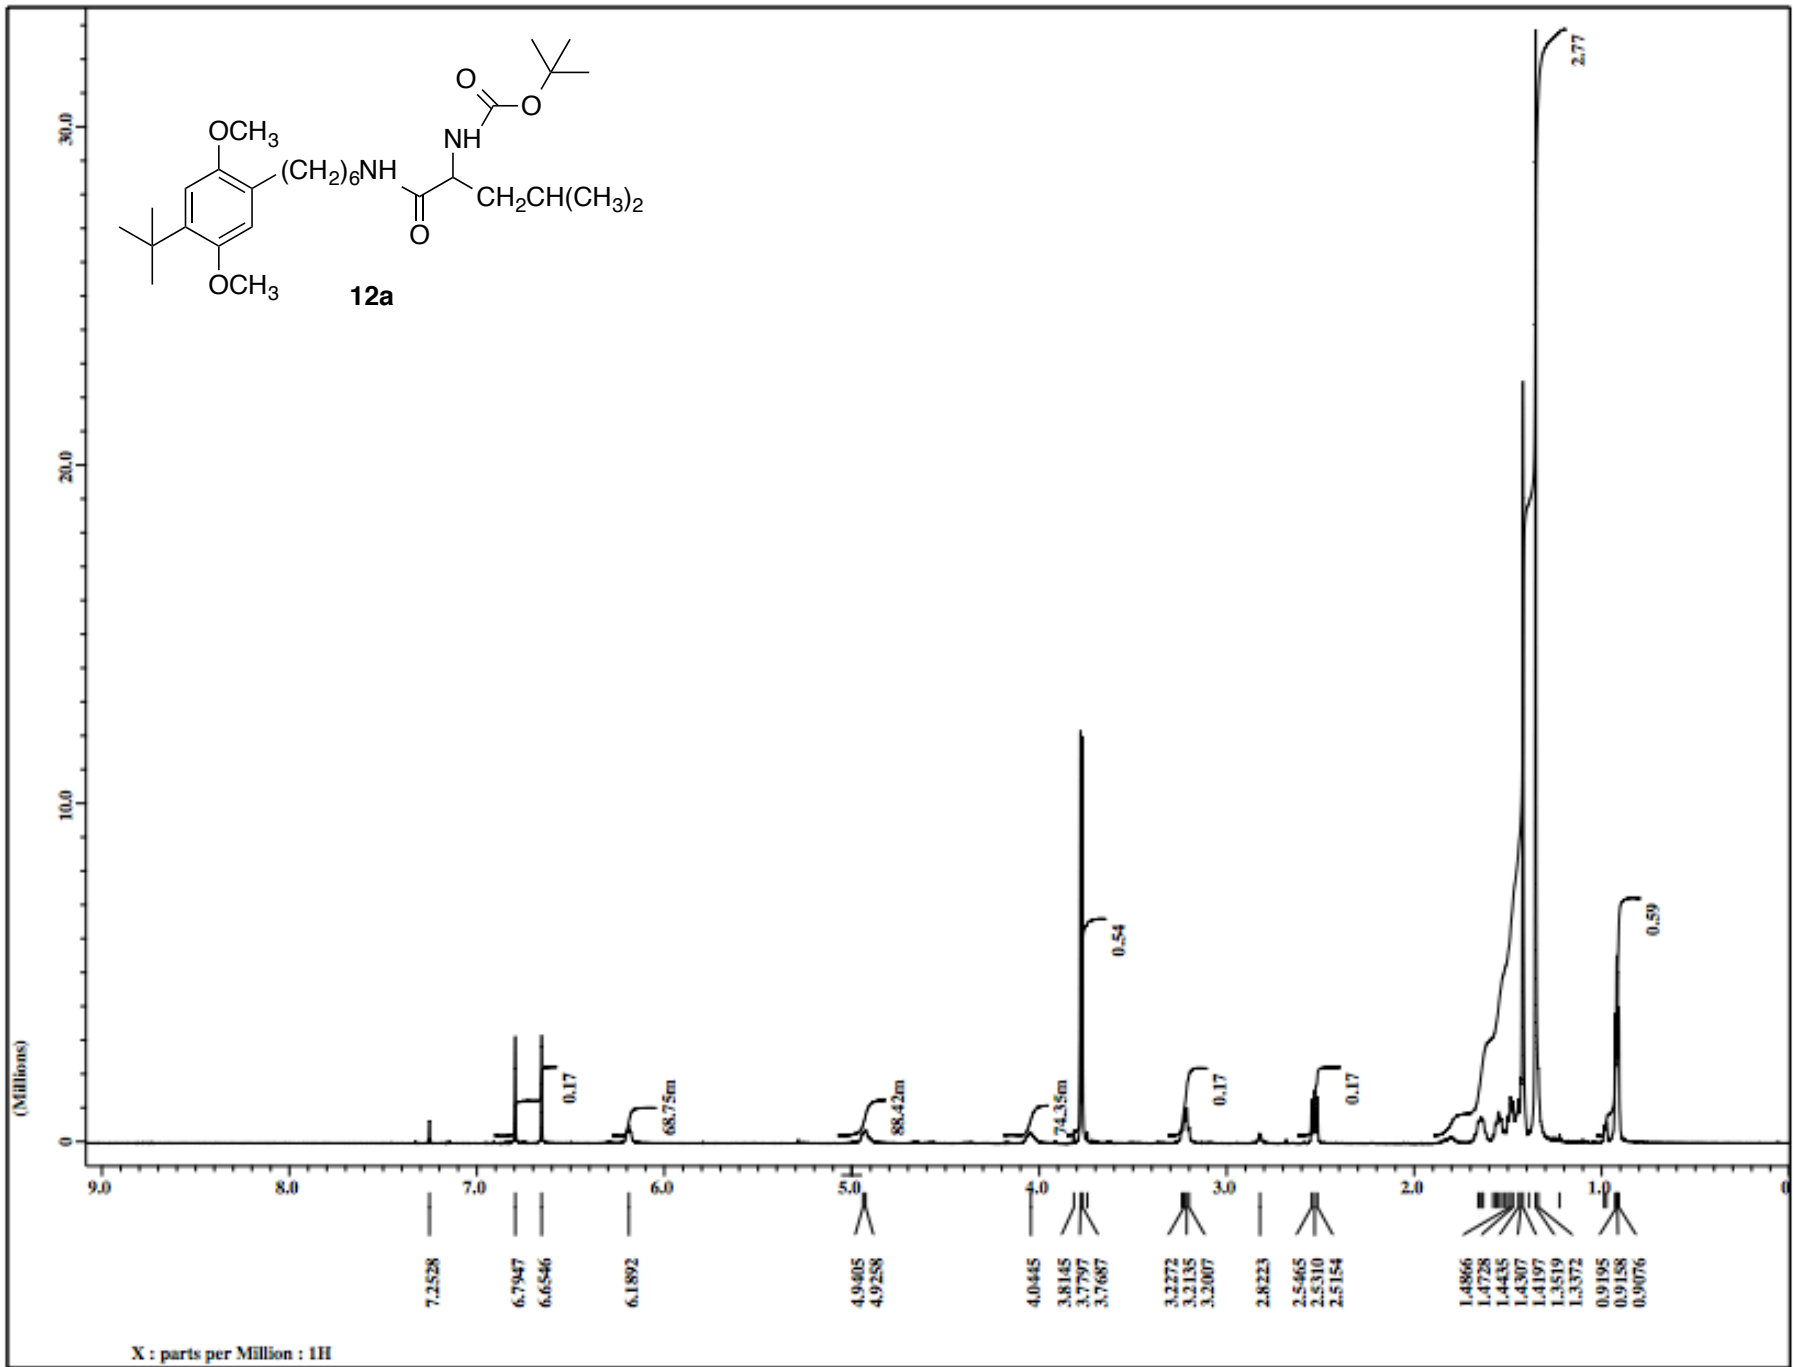

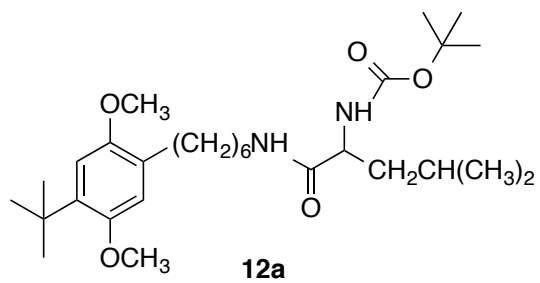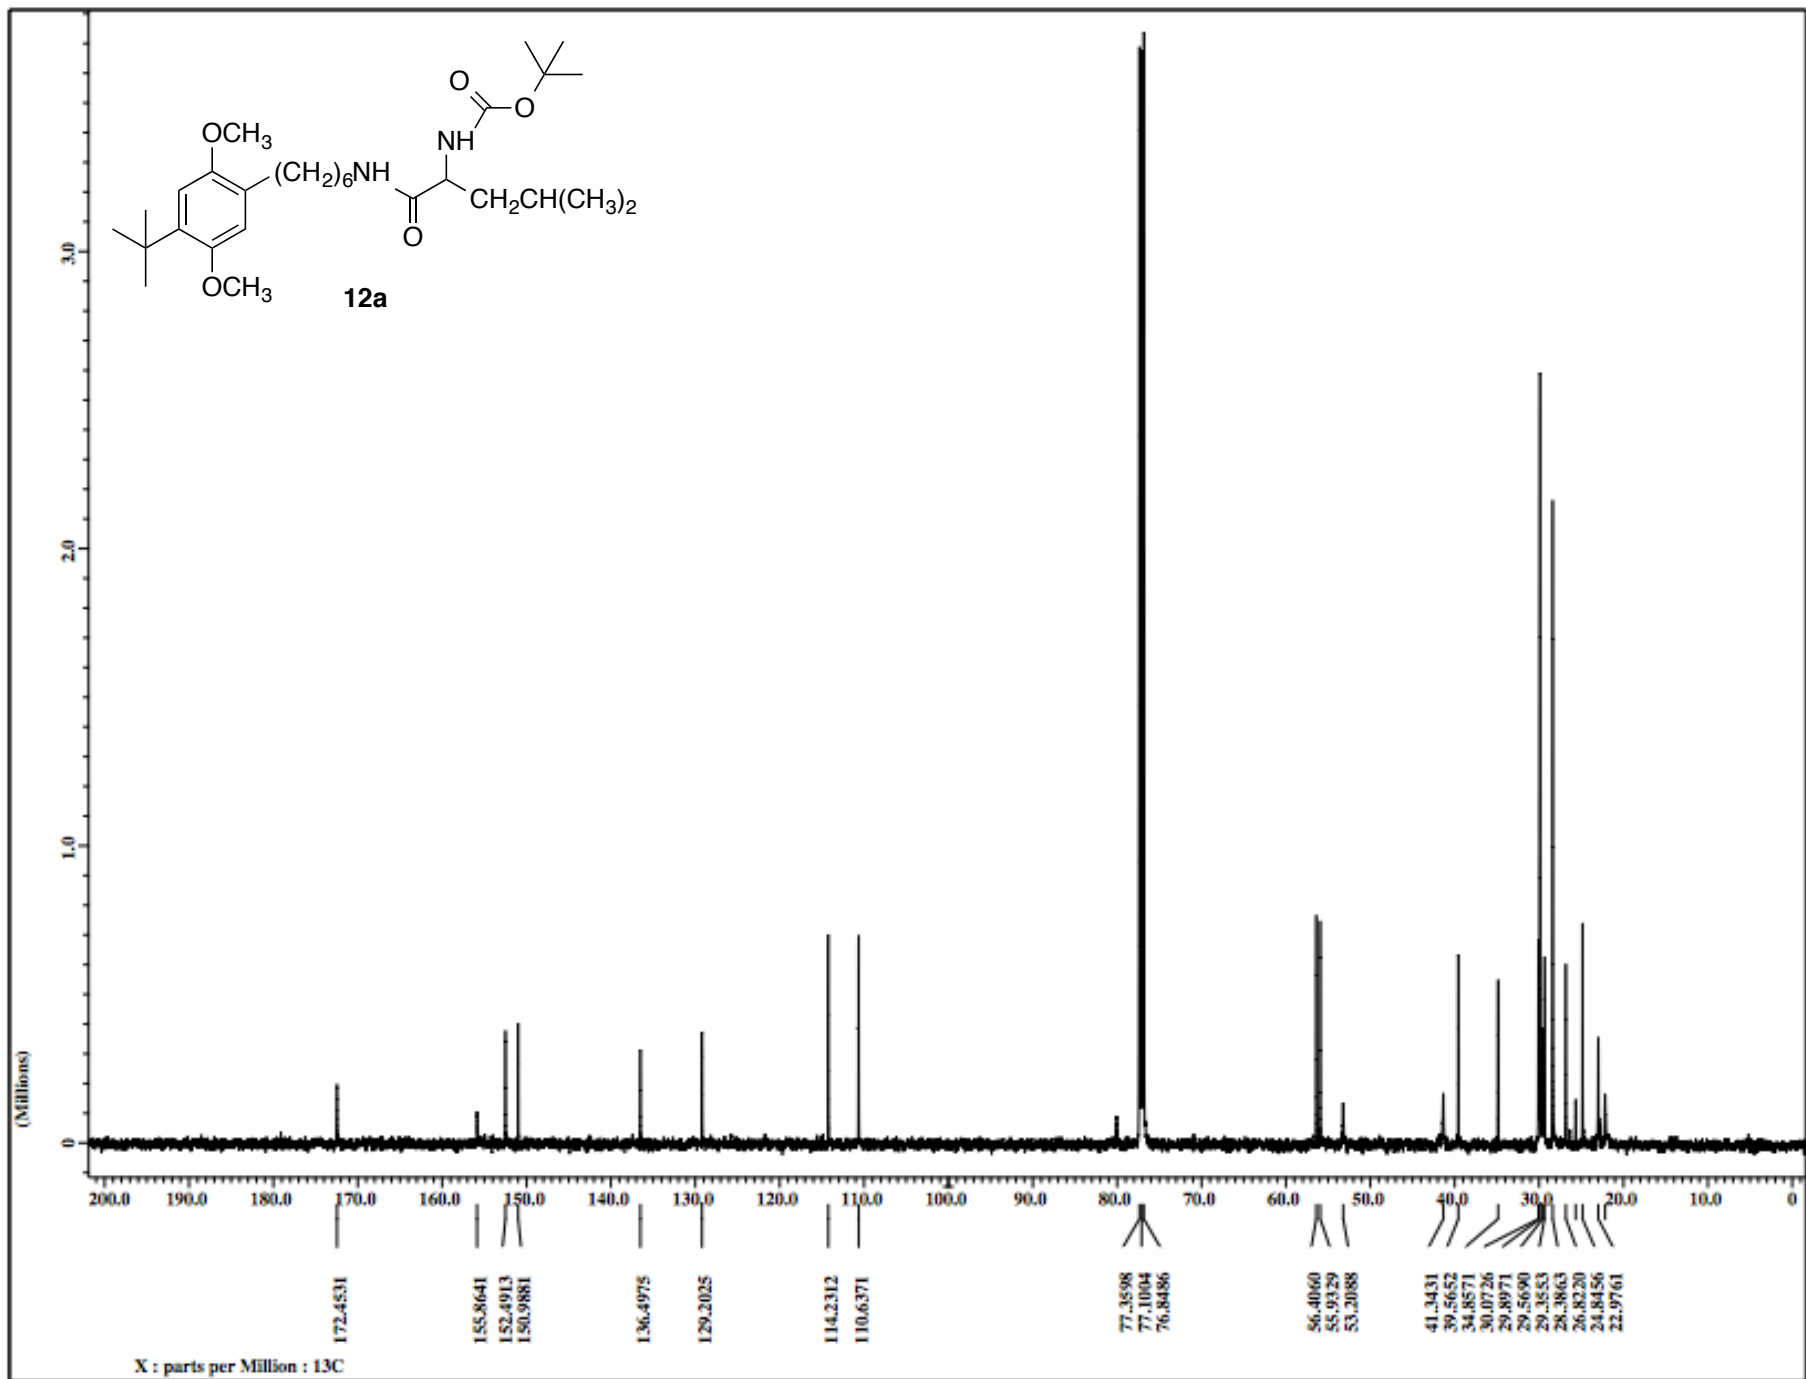

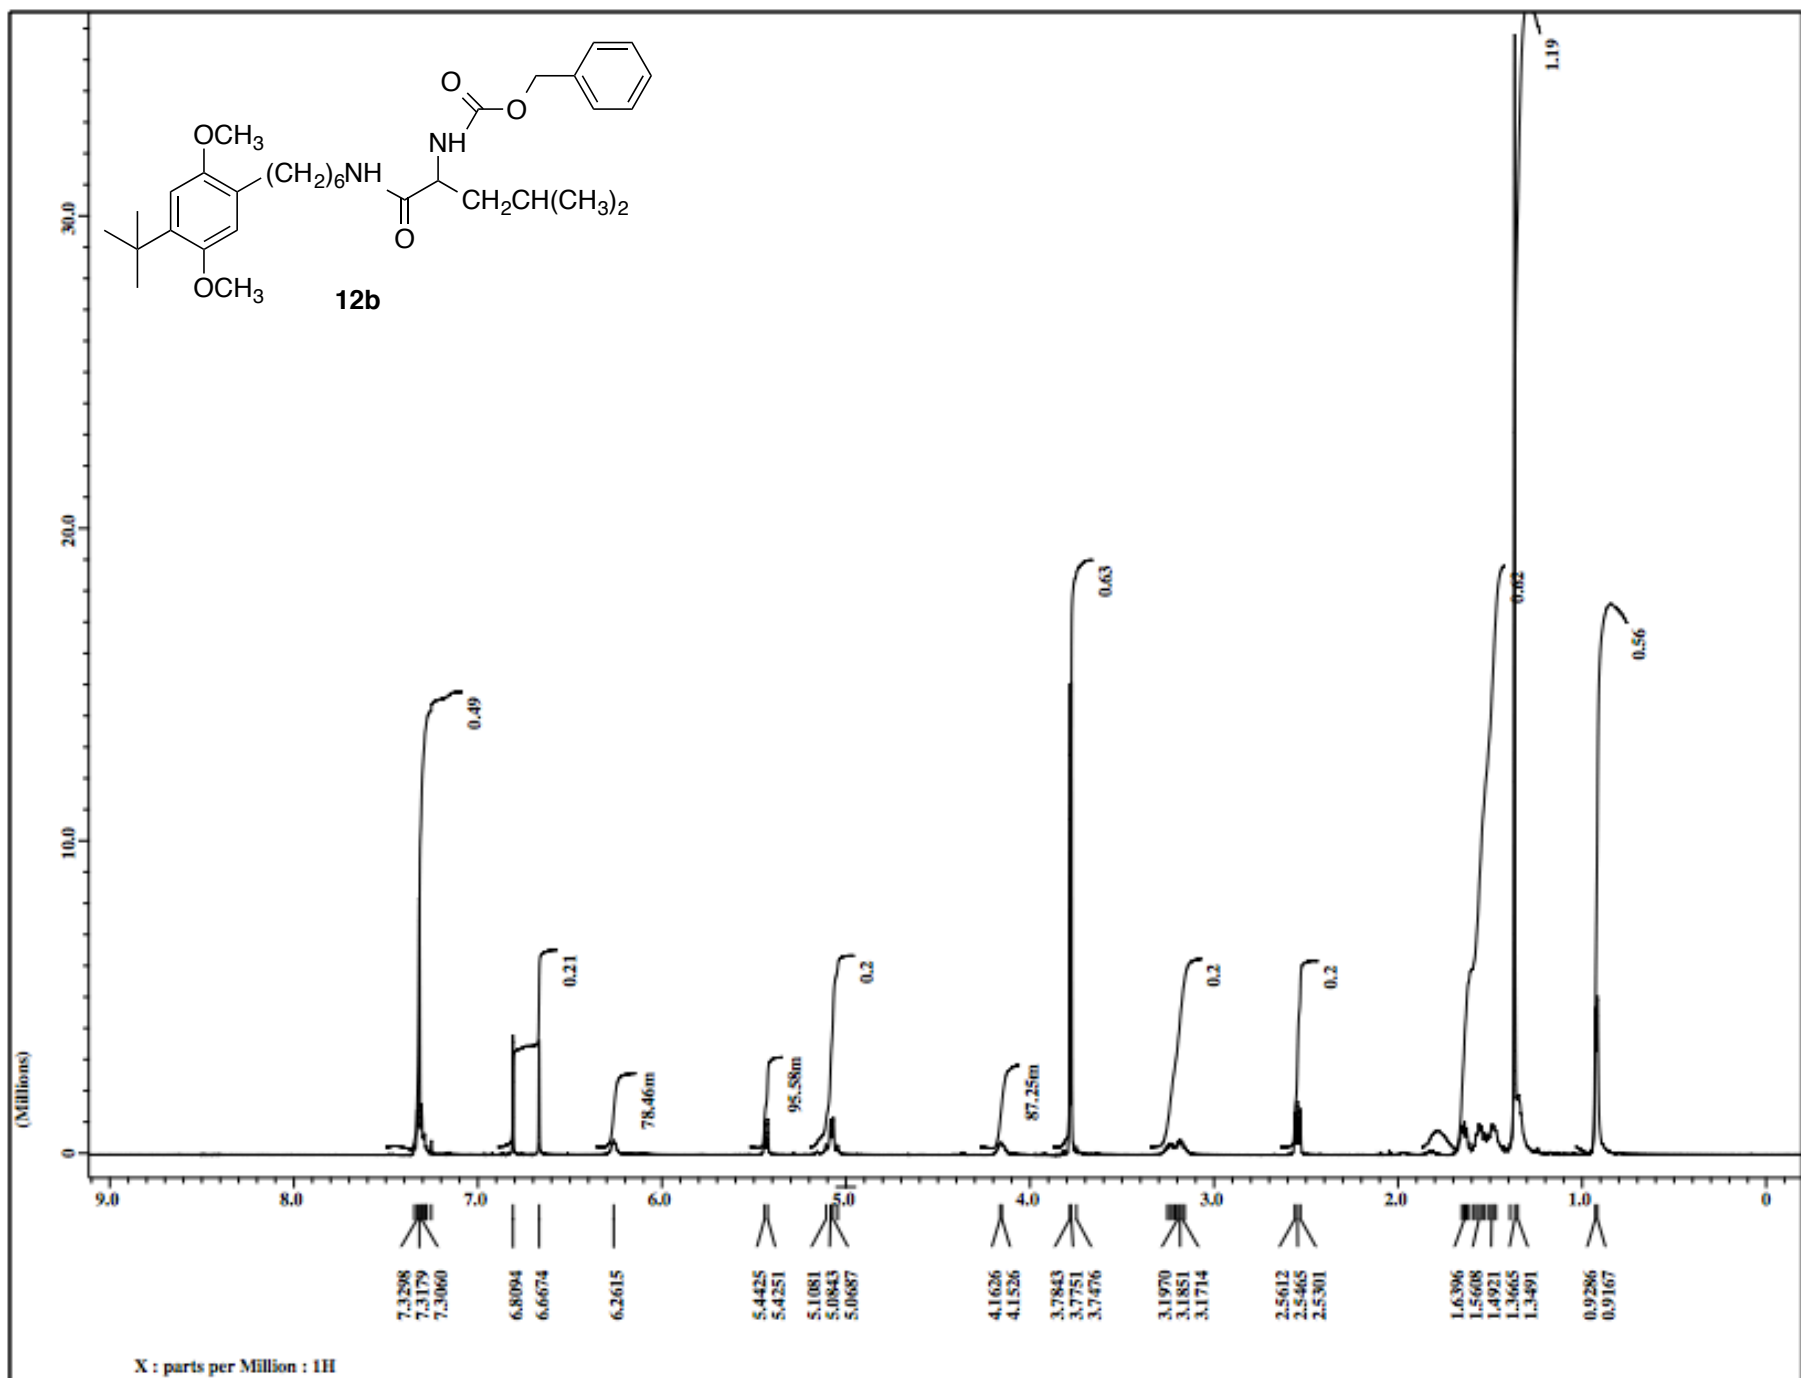

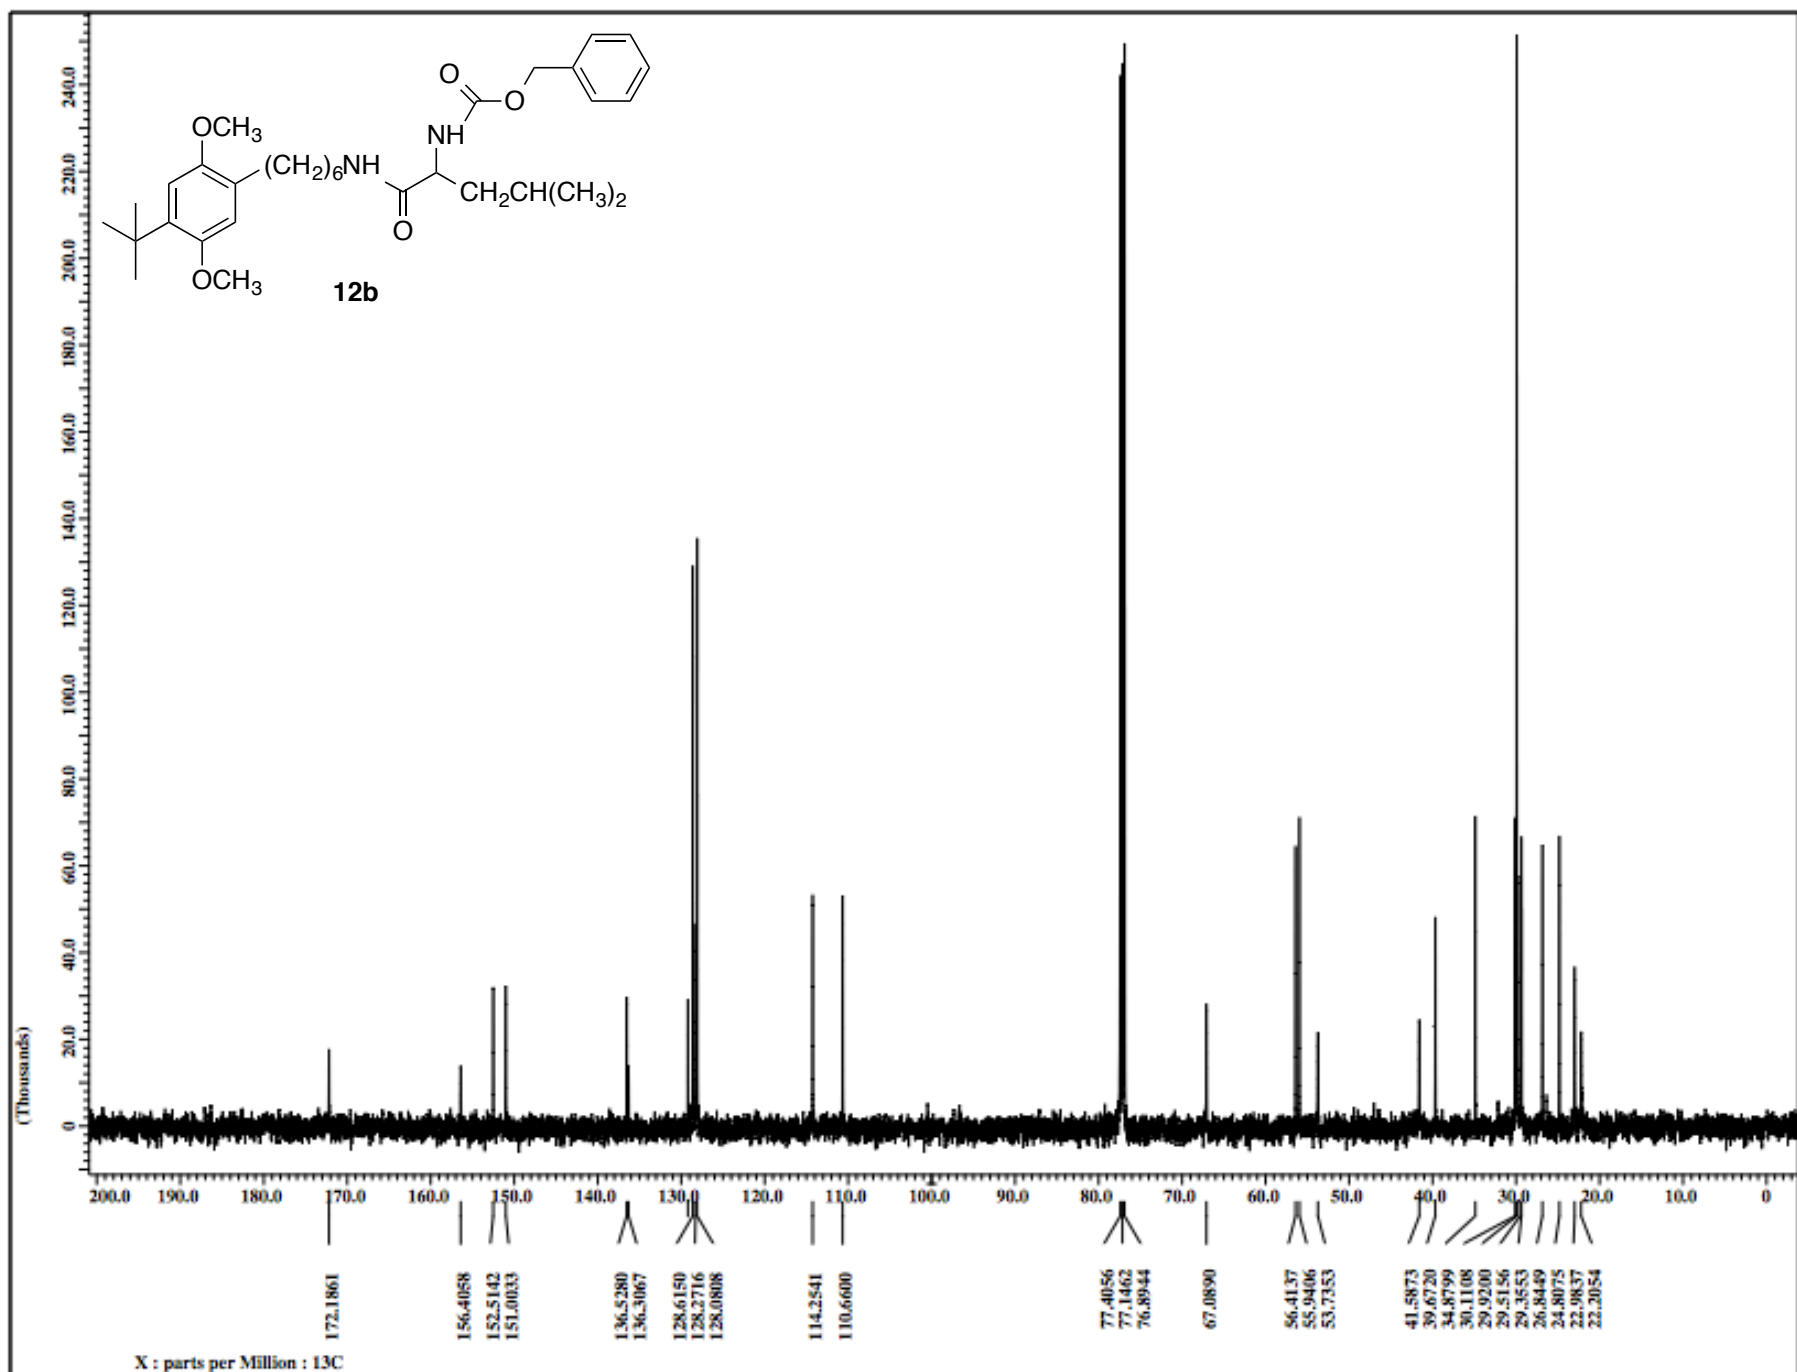

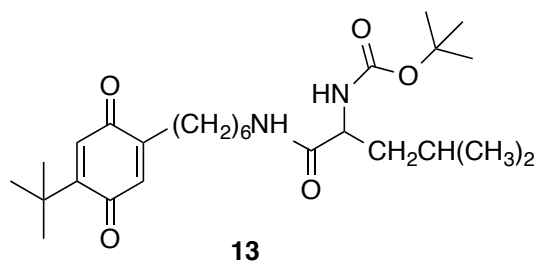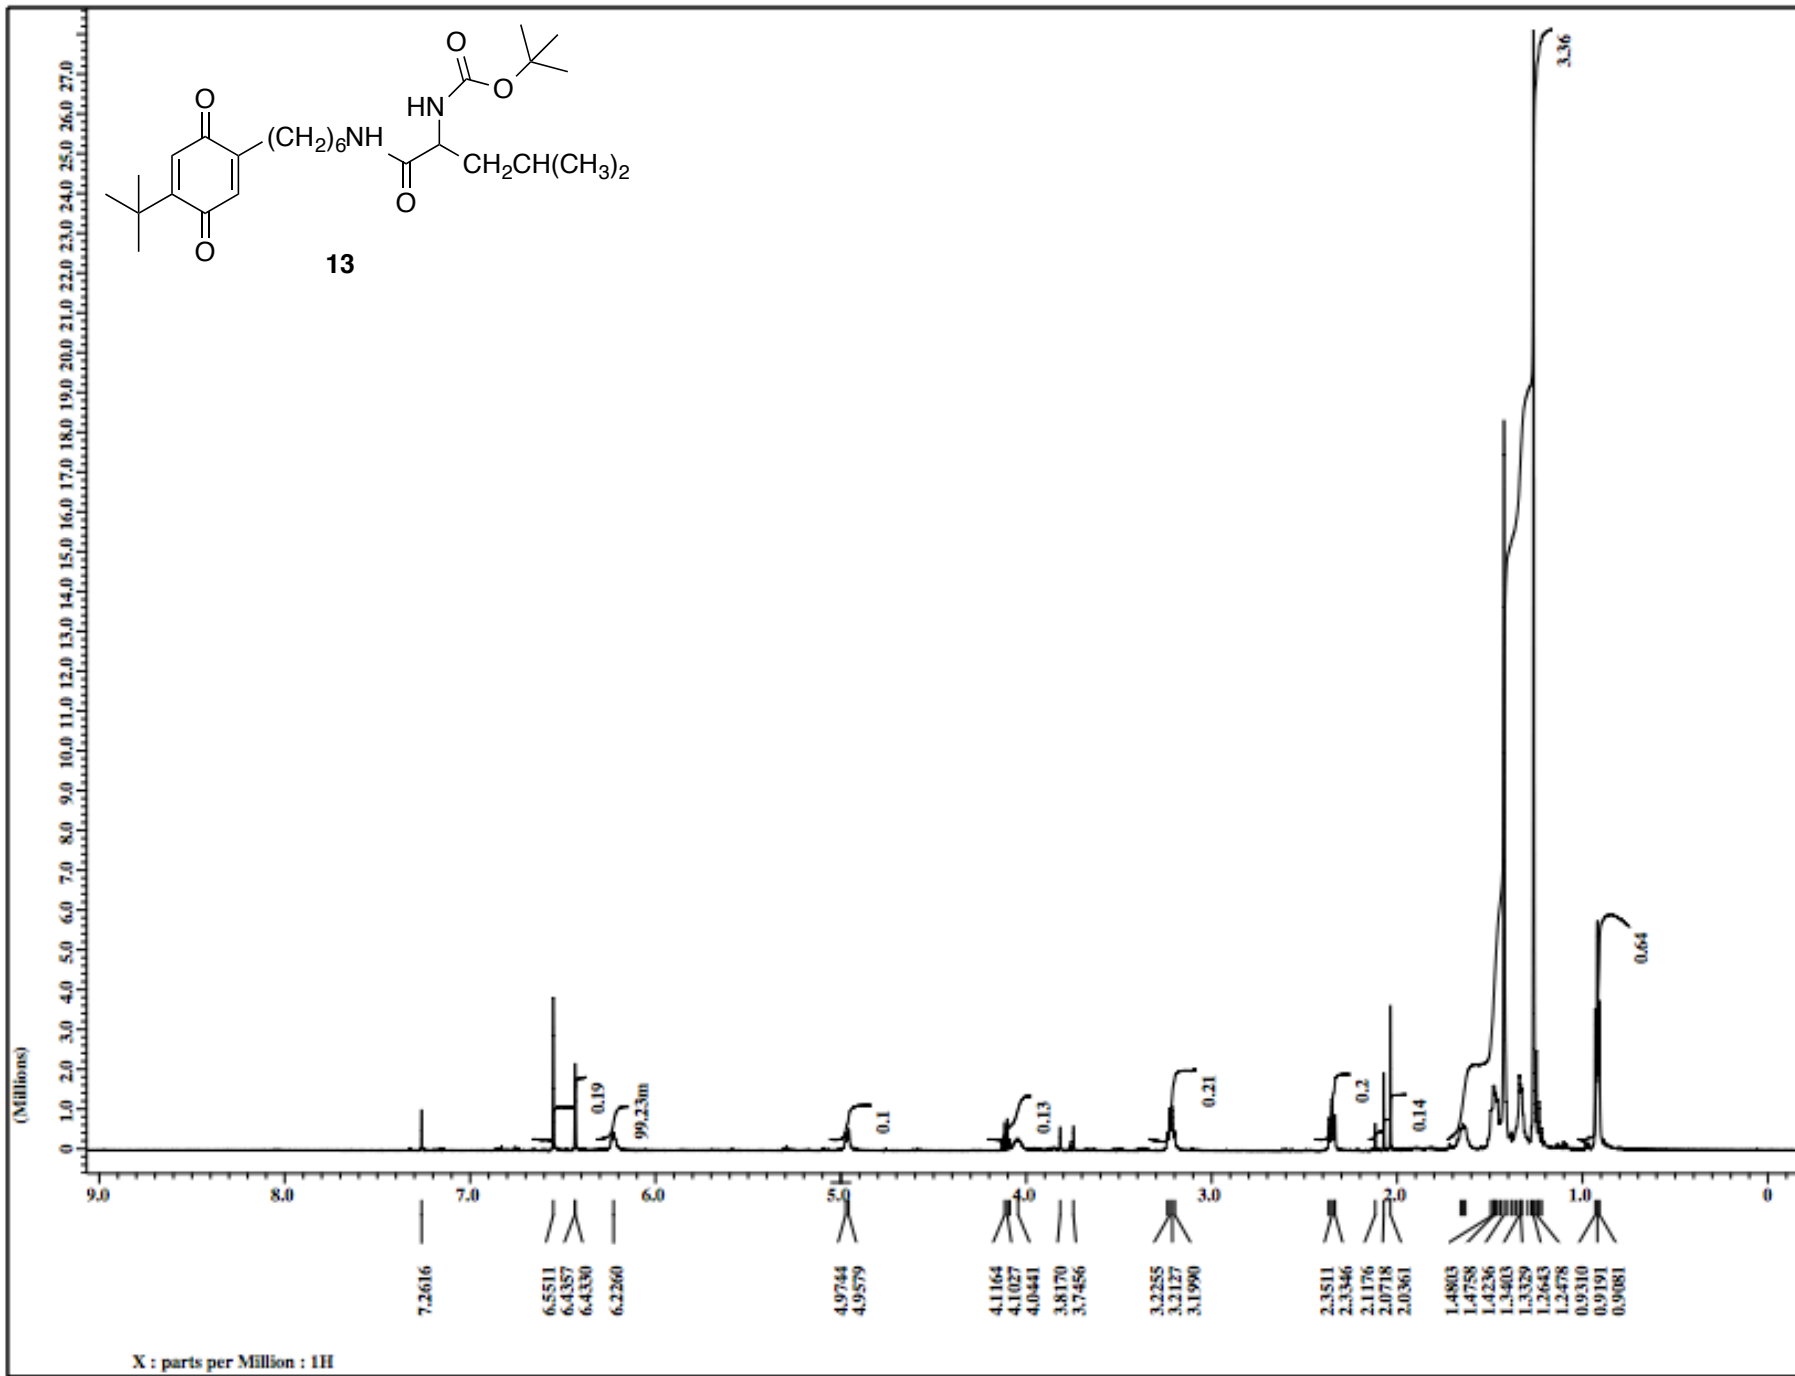

X : parts per Million : 1H

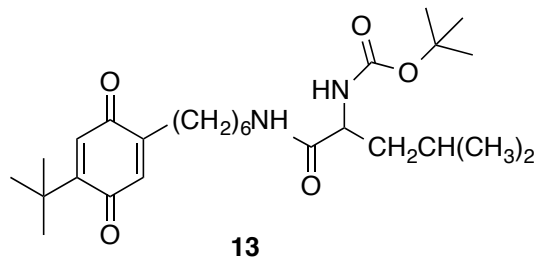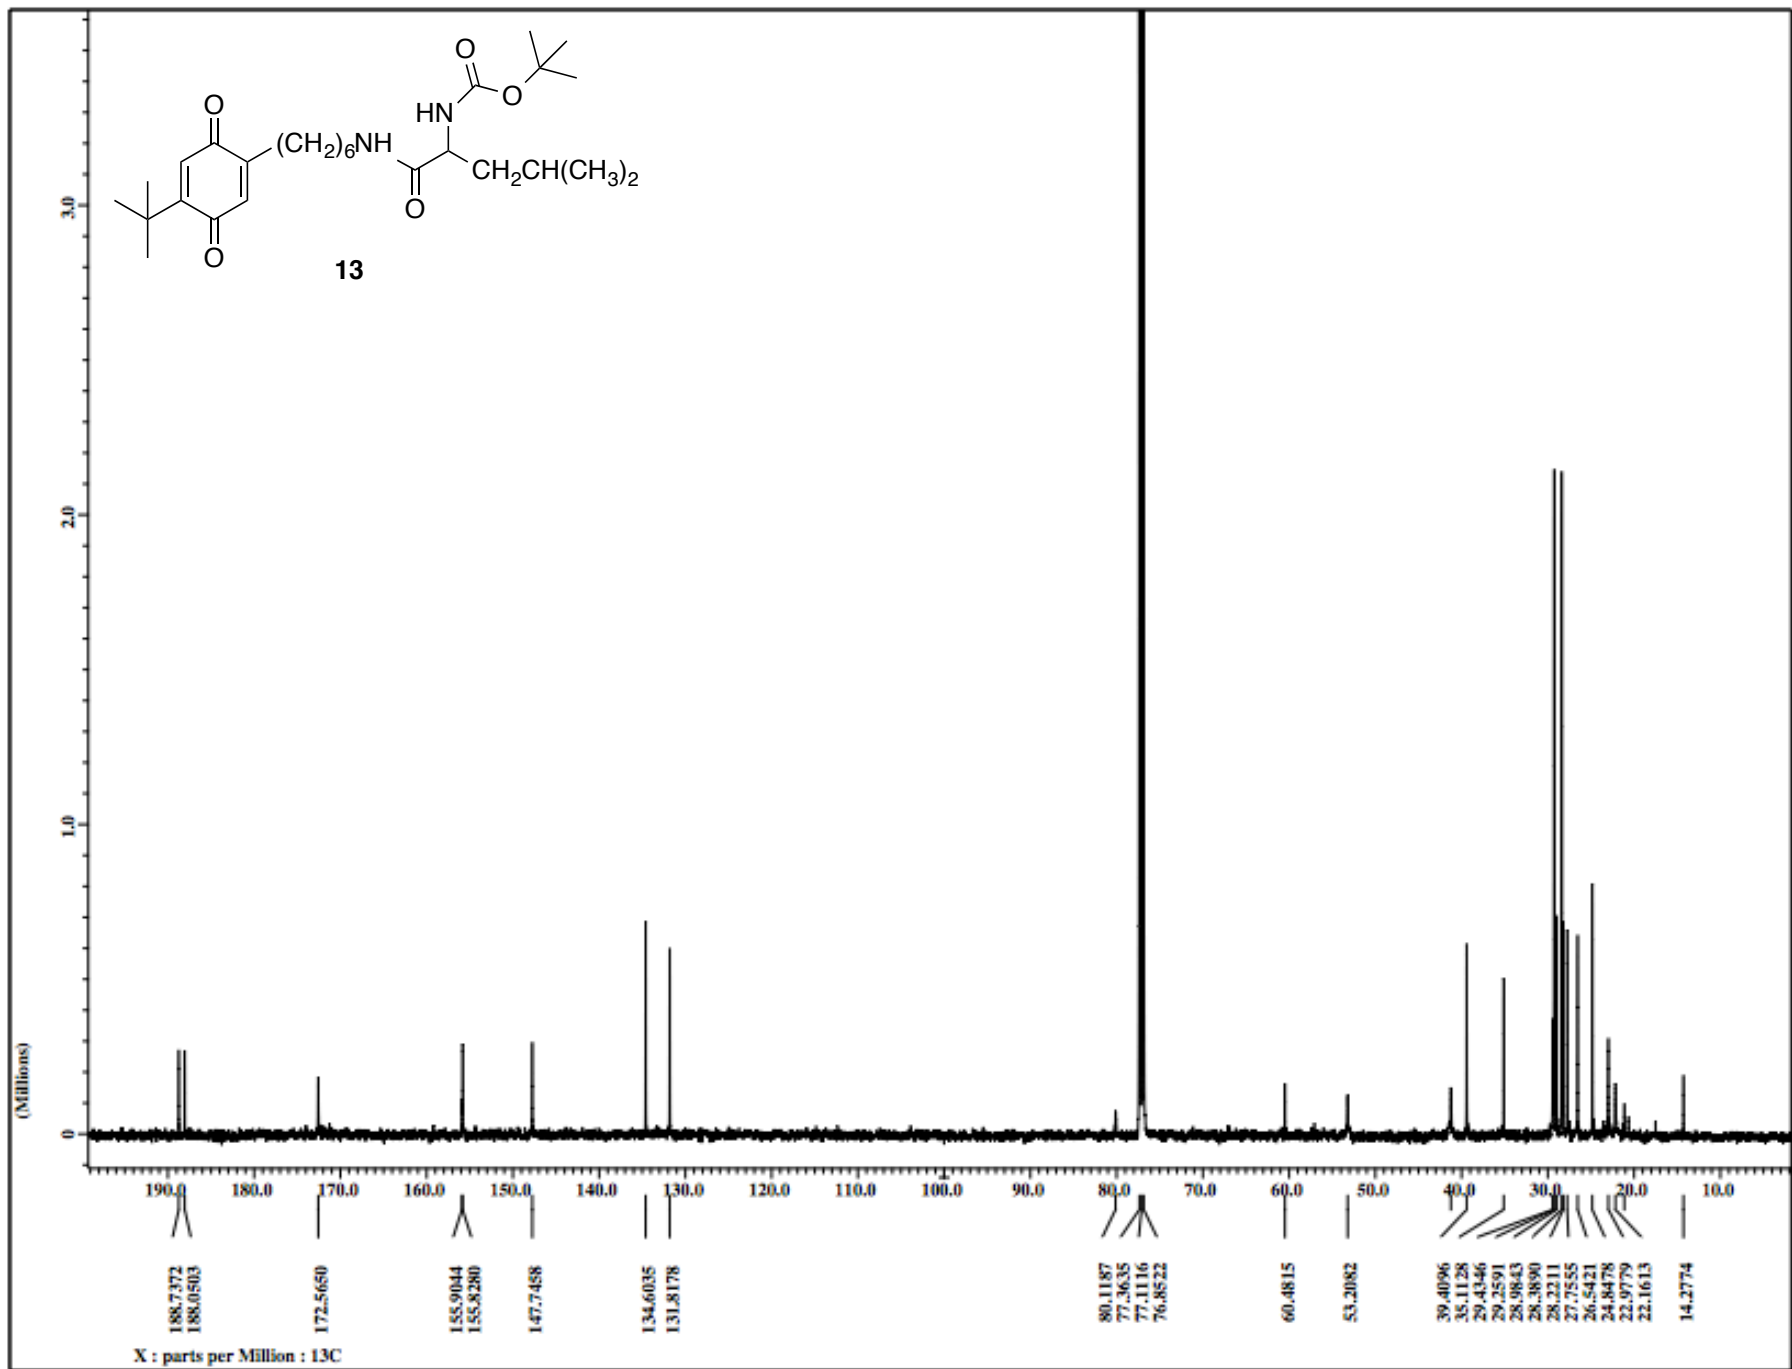

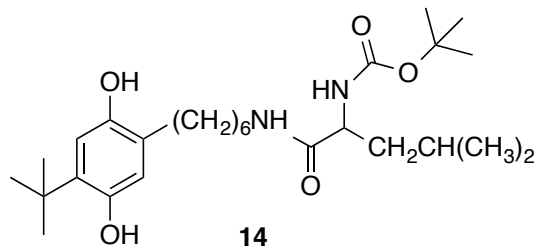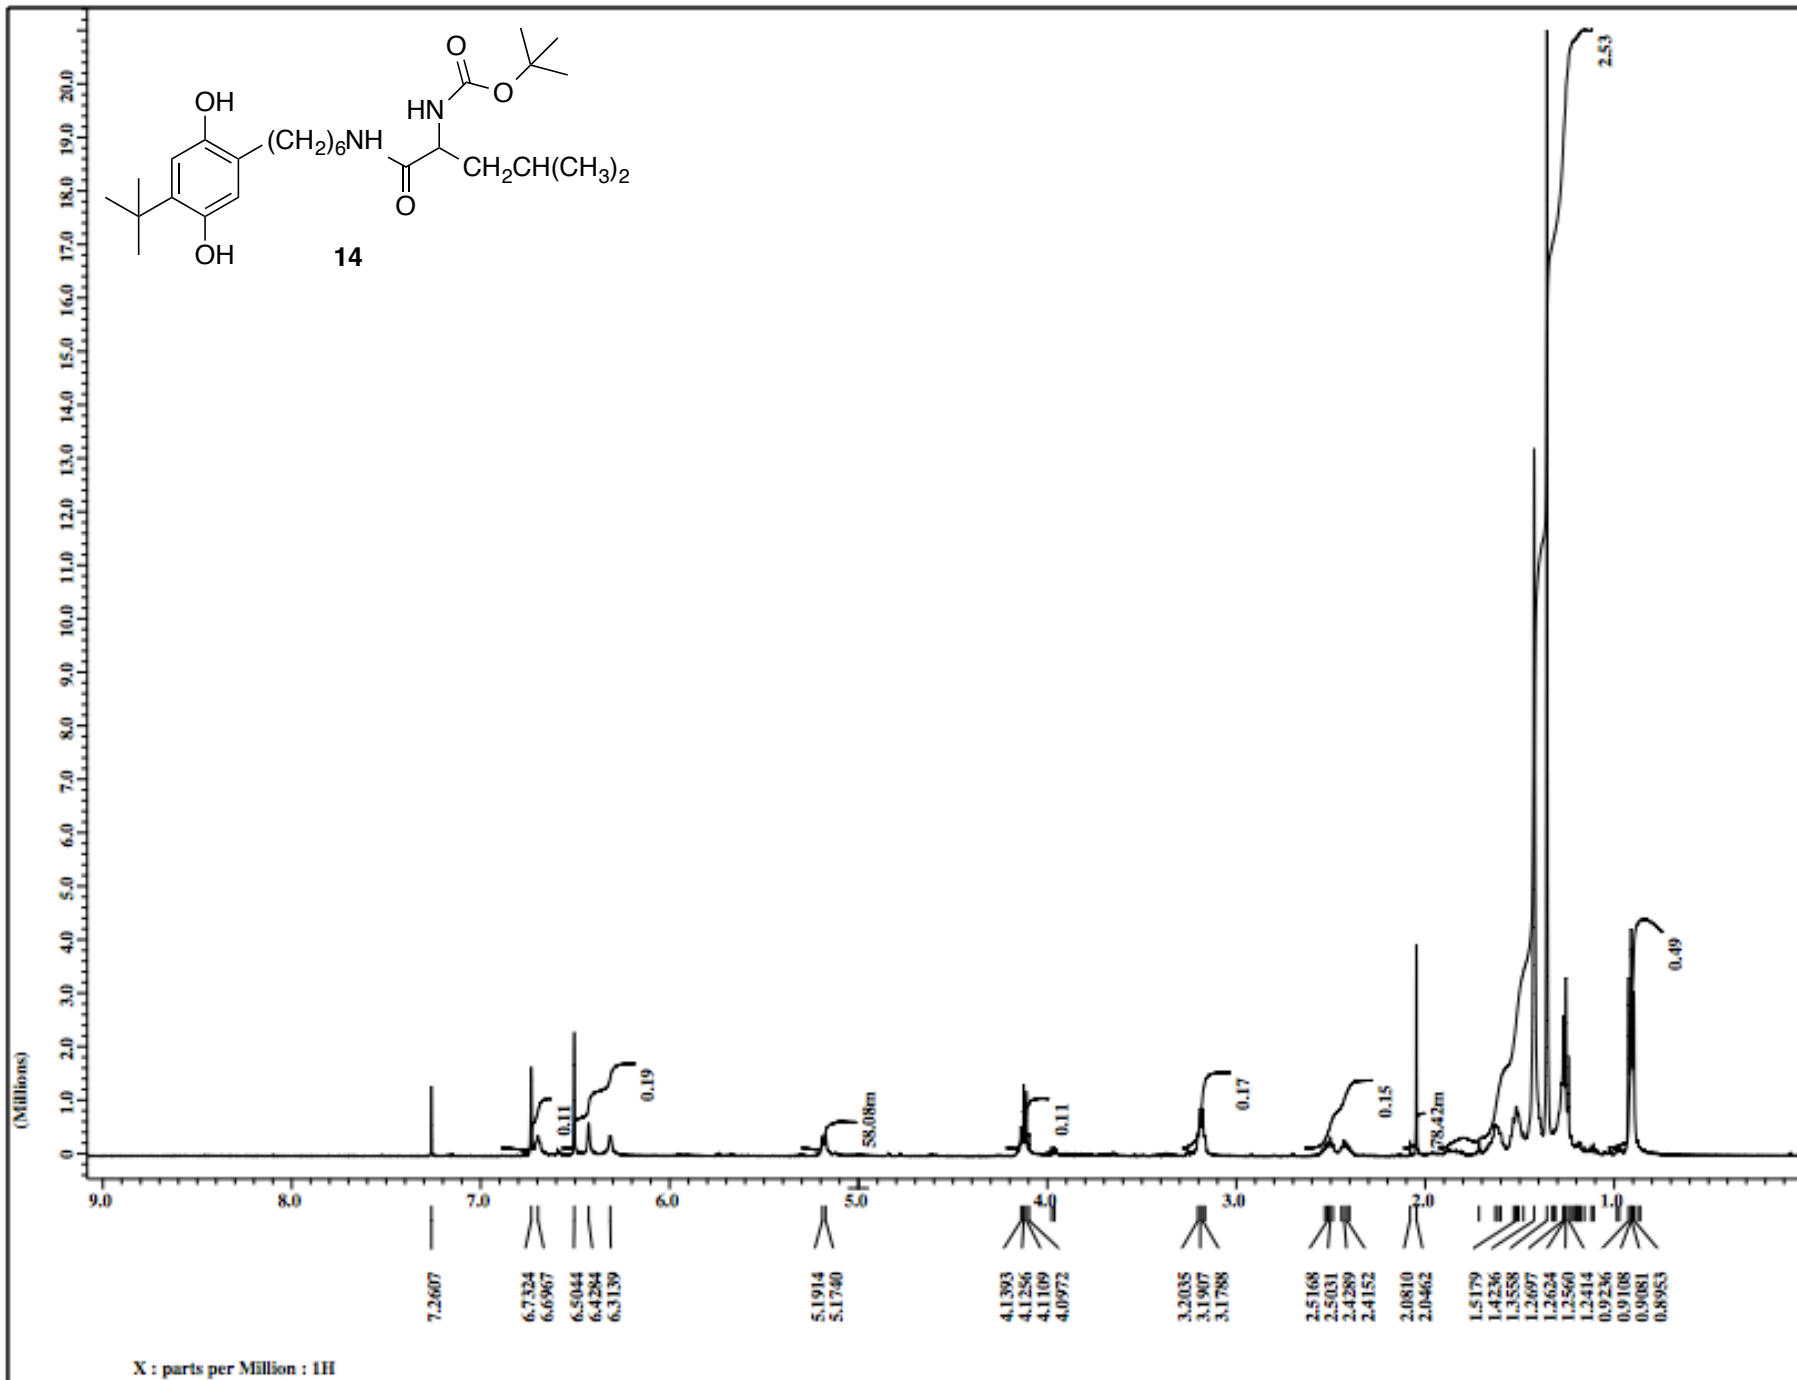



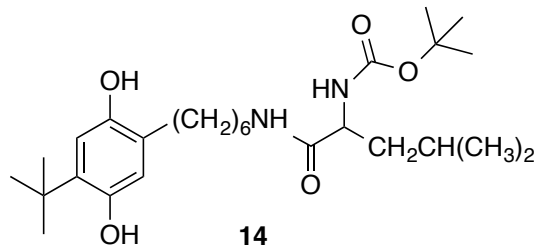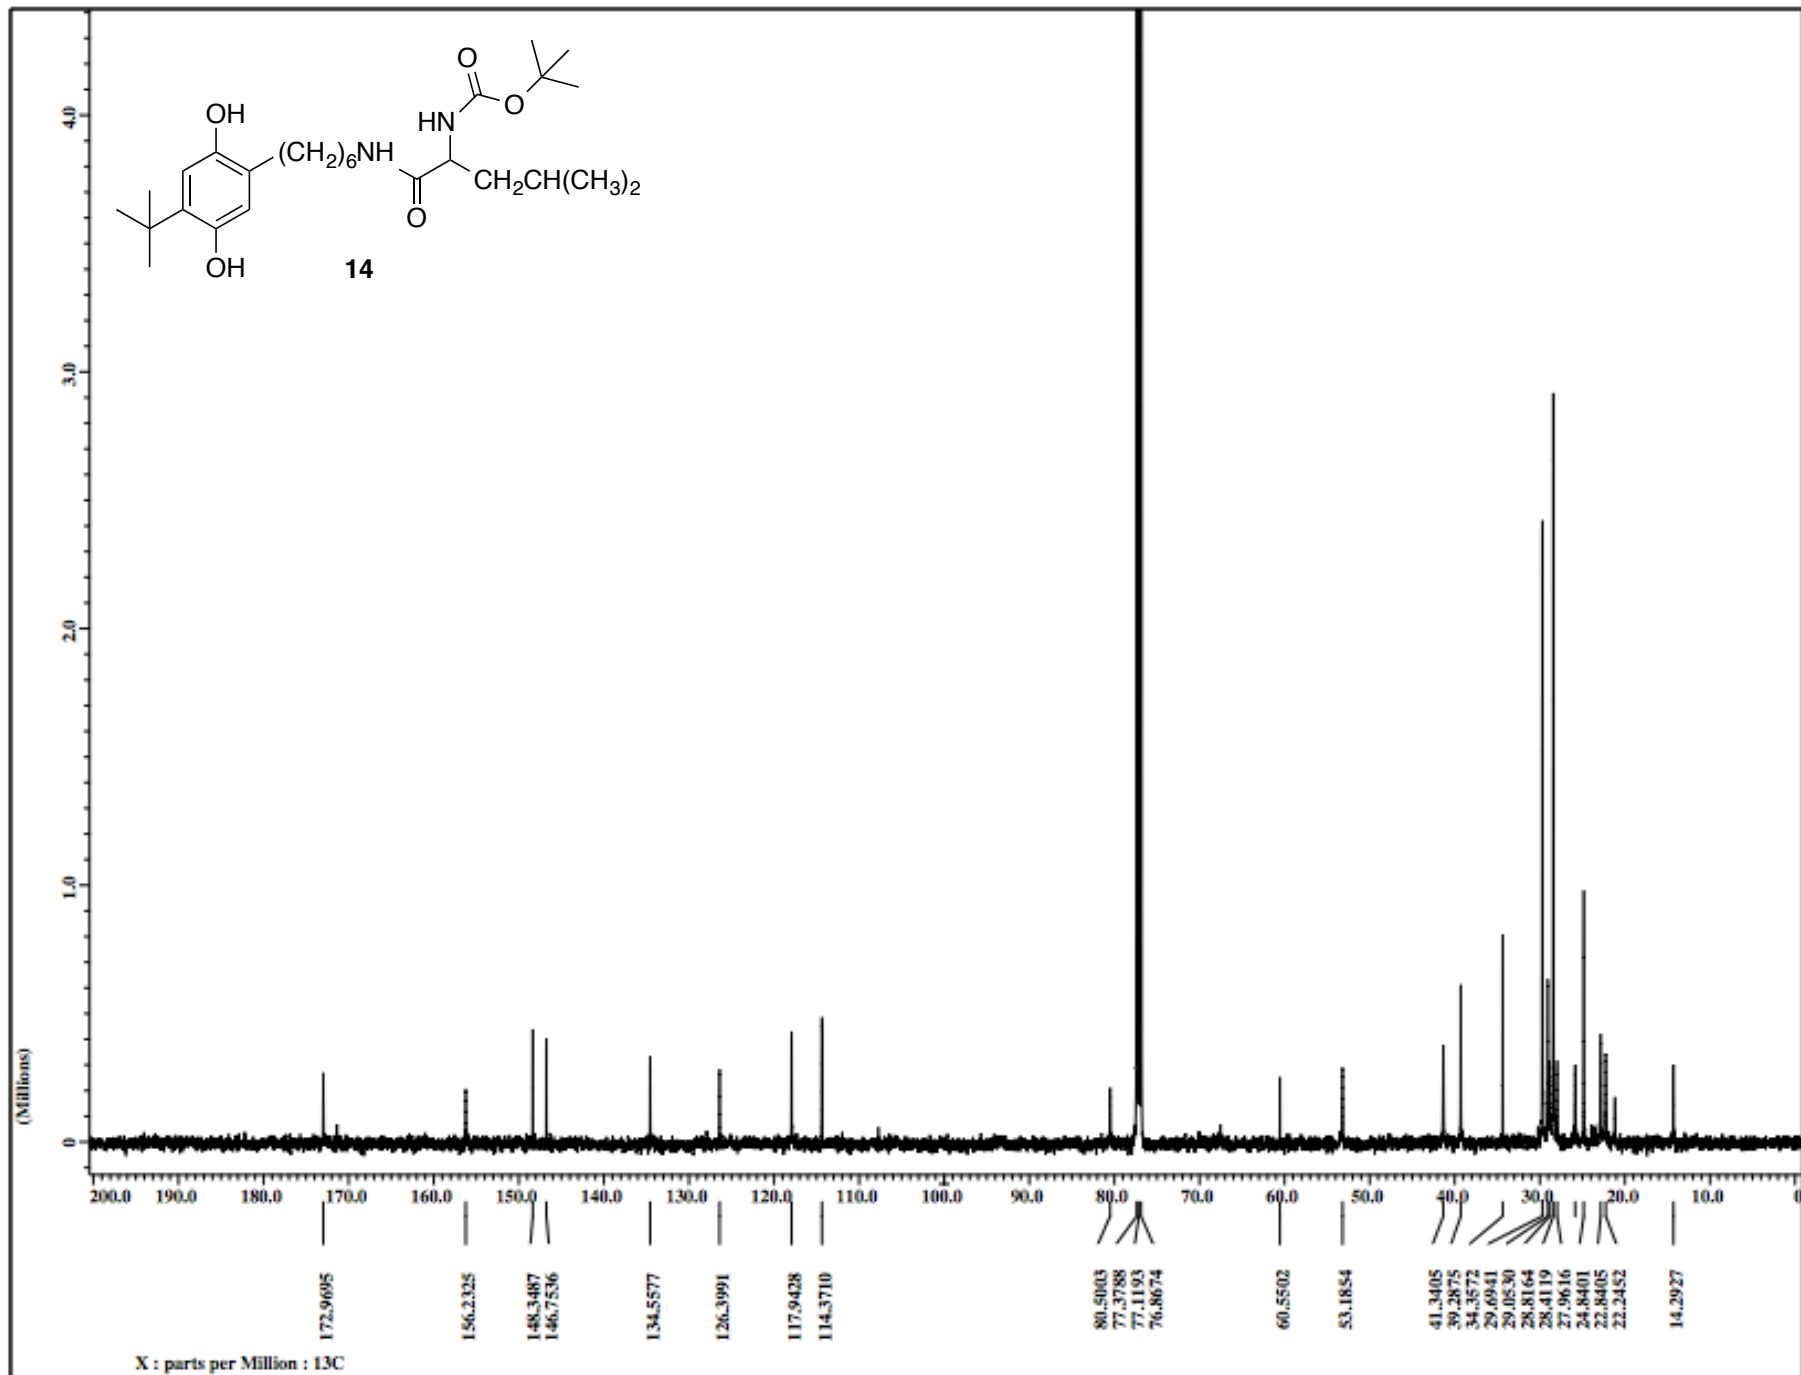

Supplement: Additional file 2 [file 1860-5397-15-94-S2.pdf]
